# Supplementary material for: The joint application of metaheuristic algorithm and Bayesian Statistics approach for uncertainty and stability assessment of nonlinear Magnetotelluric data
Source: Copernicus journal article supplement (doi:10.5194/npg-2023-8), 2023-04-25
Supplement: Supplementary file [file npg-2023-8-AC2-supplement.pdf]

Reply to Referee #2

Nonlinear processes in geophysics

Thank you for giving your valuable time to reviewing our manuscript (npg-2023-8). Your thoughtful feedback has been immensely valuable in refining our research. We acknowledge the areas of improvement you highlighted. Your suggestions will undoubtedly improve the manuscript's overall impact and contribute to the advancement of the field. We are grateful for your expertise and constructive criticism, which will undoubtedly enhance the quality of our work. Should you have any further insights, please feel free to share them. Once again, thank you for your invaluable contribution.

Thanking you

Yours sincerely  
Mukesh Mukesh

**Comment 1.** The current manuscript structure is not conducive to reading, and it is suggested to modify the manuscript structure into five parts: introduction, data and methods, results and analysis, discussion, and conclusion

**Reply:** The structure of the manuscript has been modified into five parts: introduction, data and methods, results and analysis, discussion, and conclusion, as per comment of Referee #2. The necessary corrections required to modify the manuscript are incorporated in the revised manuscript.

**Comment 2.** It is recommended to remove the black outer borders of all figures. There may be editing errors in some places, such as missing half of the brackets in the title of Figure 2.

**Reply:** Thank you for your suggestion. The black outer borders of all figures has been removed and the editing error in title of figure 2 has been corrected in the revised manuscript.

**Comment 3.** The discussion part should be compared with the previous work from the perspective of data, methods, results, etc., to show the progressiveness and limitations of this work. However, there is almost no previous reference in the discussion section of this manuscript.

**Reply:** Thank you for your feedback. We acknowledge the importance of comparing our work with previous studies to highlight its progressiveness and limitations. In our revision, we have thoroughly address this concern by incorporating relevant references and discussing how our research builds upon existing knowledge. We appreciate your valuable input and are committed to improving the manuscript accordingly.
