# Supplementary material for: The joint application of metaheuristic algorithm and Bayesian Statistics approach for uncertainty and stability assessment of nonlinear Magnetotelluric data
Source: Copernicus journal article supplement (doi:10.5194/npg-2023-8), 2023-04-25
Supplement: Supplementary file [file npg-2023-8-RC1-supplement.pdf]

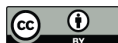

27 **Abstract**

28 In this paper, we have developed the Matlab code for a weighted hybrid of particle swarm  
29 optimization (PSO) and gravitational search algorithm (GSA) known as wPSOGSA, GSA, and  
30 PSO algorithms to interpret one-dimensional magnetotelluric (MT) data for some corrupted and  
31 non-corrupted synthetic data, as well as two examples of MT field data over different geological  
32 terrains: (i) geothermal rich area, Island of Milos, Greece, and (ii) Southern Scotland due to the  
33 occurrence of a significantly high electrical conductivity anomaly under crust and upper mantle  
34 extending from the Midland Valley across the Southern Uplands into northern England. Even  
35 though the fact that many models provide a good fit in a large predefined search space, specific  
36 models do not fit well. As a result, we used a Bayesian statistical technique to construct and assess  
37 the posterior probability density function (PDF) rather than picking the global model based on the  
38 lowest misfit error. This is proceeded by 68.27 % confidence interval for selecting a region where  
39 PDF is more prevalent to estimate the mean model which is more accurate and close to the true  
40 model. For illustration, correlation matrices show a significant relationship among layer  
41 parameters. The findings indicate, the wPSOGSA is less sensitive to model parameters and  
42 produces well, more stable and reliable results with the least uncertainty in the model that is  
43 compatible with existing borehole samples. Furthermore, the present methods resolve two  
44 additional geologically significant layers, one highly conductive (less than 1.0  $\Omega\text{m}$ ) and another  
45 resistive (300.0  $\Omega\text{m}$ ) over the Island of Milos, Greece, characterized by alluvium and volcanic  
46 deposits, respectively, as corroborated by borehole stratigraphy.

47

48 **Keywords:** Magnetotelluric; Inversion; Uncertainty; wPSOGSA; Posterior; Bayesian.

49

50

51



## 52 1.0 Introduction

53 The magnetotelluric (MT) method is a natural source electromagnetic method that explores  
54 various natural resources, namely hydrocarbon, minerals, geothermal prospects, groundwater,  
55 metalliferous ores, etc. (Nabighian and Asten, 2002; Simpson and Bahr, 2005). Due to its  
56 instability, non-unique solution, and algorithm sensitivity, the MT data interpretation is thought-  
57 provoking. Many researchers have attempted and developed various inversion algorithms to  
58 interpret, improve the model accuracy, convergence speed, stability and reduce the uncertainty of  
59 the solutions (Kirkpatrick, et al., 1983; Constable et al., 1987; Rodi and Mackie, 2001; Li et al.,  
60 2018; Zhang et al., 2019; Khishe and Mosavi, 2020). There are mainly two categories of the  
61 inversion algorithm: first, the local optimization methods namely Conjugate gradient, Levenberg-  
62 Marquardt/Ridge regression, Newton-Gauss, Steepest descent, and Occam inversion, requires  
63 good initial guess (Shaw and Srivastava, 2007; Wen et al., 2019; Roy and Kumar, 2021) and  
64 another is global optimization techniques (i.e., Ant colony optimization, Genetic algorithm,  
65 Particle swarm optimization, Gravitational search algorithm, Simulated annealing, etc.) does not  
66 require initial guess. Many researchers have carried out numerous metaheuristic optimization  
67 algorithms to invert MT data (Dosso and Oldenburg, 1991; Pérez-Flores and Schultz, 2002;  
68 Miecznik et al., 2003; Sen and Stoffa, 2013). These algorithms are inspired by the natural  
69 phenomenon include Particle Swarm Optimization (Kennedy and Eberhart, 1995), Genetic  
70 Algorithm (Whitley, 1994), Bat algorithm (Yang, 2010a), Differential Evolution (Storn and Price,  
71 1997), biogeographically based Optimization (Simon, 2008), Firefly algorithm (Yang, 2010b),  
72 Grey Wolves Optimizer (Mirjalili et al., 2014), Ant Colony (Colormi et al., 1991), Gravitational  
73 Search Algorithm (Rashedi et al., 2009).

74 However, unique characteristics, namely exploration and exploitation, persist in global  
75 optimization algorithms. For example, the PSO algorithm has a very high potential for  
76 exploitation, which implies that the algorithm performs well in local search but is inferior in  
77 exploration (Şenel et al., 2019). This suggests that the algorithm has a limited capacity to estimate



78 the best model in an extensive search range. Because of low exploration characteristics, it gets  
79 trapped at the local minima (Mirjalili and Hashim, 2010). So, integrating the two algorithms with  
80 opposite characteristics is the best way to solve the exploration and exploitation characteristics,  
81 which provide better solutions than the results obtained from an individual algorithm.

82 Here, we utilized wPSOGSA, a new global optimization method that takes into account the  
83 algorithm based on natural behavior seen in birds, fish, and insects known as Particle swarm  
84 optimization (PSO) and gravity-based Newton's law (with high exploration capability) known as  
85 Gravity search algorithm (GSA). Researchers interested in artificial intelligence and developing  
86 effective optimization algorithms have been drawn to notable characteristics in such social  
87 behavior. The wPSOGSA, PSO, and GSA are used to estimate resistivity distribution of a multi-  
88 layered 1D earth model using synthetic (noise free and noisy) data for three and four layers cases  
89 taken from Shaw and Srivastava (2007) and Xiong et al. (2018), respectively and field MT  
90 sounding data for four and six layers cases taken from Jones and Hutton (1979).and Hutton et al.  
91 (1989) respectively.

92 Furthermore, numerous (here 10000) models that fit well are optimized for getting the  
93 mean model, which is proceeded by calculating posterior PDF based on Bayesian concepts  
94 using all accepted models to find the optimal mean solution with the least uncertainty, as well  
95 as a correlation matrix to determine the relationships among the layer parameters. Thus, our  
96 analysis suggests that the wPSOGSA algorithm offers a more accurate and trustworthy model  
97 with better stability, fast convergent rate and the least uncertainty in the model.

98

## 99 **2.0 Forward Modelling- Magnetotelluric formulation for 1-D earth**

100 The ability to formulate an effective inversion method requires a thorough understanding of the  
101 forward modeling technique for the issue of interest. Factors like frequency range, actual  
102 resistivity, and layer thickness are used to create synthetic MT apparent resistivity,  $\rho_a(\omega)$  and  
103 apparent phase,  $\varphi_a(\omega)$  data sets. The electromagnetic impedance ( $Z$ ) for layered structures is

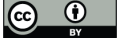

104 described in terms of an orthogonal horizontal electric field, magnetic field, wavenumber (k),  
105 reflection coefficient (R), and exponent factor ( $\tau_f$ ) with angular frequency ( $\omega$ ) as (Ward and  
106 Hohmann, 1988):

$$107 \quad Z = \frac{\mu_0 \omega}{k} = \frac{E_x}{H_y} = -\frac{E_y}{H_x}, \quad (1)$$

108 Where, the wavenumber( $k$ ) =  $\sqrt{-i\mu_0\omega/\rho}$ , component of electric field ( $E_x$  and  $E_y$ ) and magnetic  
109 field component ( $H_x$  and  $H_y$ ).

110 If displacement currents are not taken into account, Eq. (1) becomes

$$111 \quad Z = \frac{\mu_0 \omega}{\sqrt{-i\mu_0\omega/\rho}} = \sqrt{i\mu_0\omega\rho} = \sqrt{\mu_0\omega\rho} e^{\frac{i\pi}{4}} = \omega \frac{(1 - R \tau_f)}{(1 + R \tau_f)}, \quad (2)$$

112 Noisy impedance is calculated by the following equation

$$113 \quad Z_{noisy} = Z + Z \times (2 \times rand - 1) \times noise_{percent}, \quad (3)$$

114 If the angle between impedance phase with  $E_x$  is  $45^0$ , then the resistivity ( $\rho$ ) in half-space of  
115 impedance  $Z(\omega)$  and time period (T) can be written as

$$116 \quad \rho(\omega) = \frac{1}{\mu_0 \omega} |Z(\omega)|^2 = \frac{0.2T}{\mu_0} \left| \frac{E_x}{H_y} \right|^2, \quad (4)$$

117 Thus, the apparent resistivity and apparent phase are defined (Cagniard, 1953; Ward and  
118 Hohmann, 1988) as follows:

$$119 \quad \text{Apparent resistivity, } \rho_a(\omega) = \frac{1}{\mu_0 \omega} [Z(\omega)Z^*(\omega)], \quad (5)$$

$$120 \quad \text{Apparent phase, } \varphi_a(\omega) = \tan^{-1} \left( \frac{\text{img}(Z(\omega))}{\text{real}(Z(\omega))} \right), \quad (6)$$

121 Where the exponent factor,  $\tau_f = \exp(-2\gamma h)$ , the induction parameter  $\gamma = \sqrt{i\omega\mu_0/\rho}$ , h is the  
122 layer thickness,  $\mu_0$  is the magnetic permeability for free space,  $Z^*$  is the complex conjugate of  
123 impedance, and the *rand* is used for generating random number between 0 and +1.

124

125

126

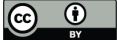

127 **3.0 Methodology**

128 The methodology that we used for joint modeling of metaheuristic global optimization namely  
129 PSO, GSA, and wPSOGSA in Step-1 and posterior Bayesian probability density function  
130 technique in Step-2 to obtain the global model by utilizing the synthetic and field MT apparent  
131 resistivity and phase curves is depicted in the schematic diagram (Fig. 1), and the steps are  
132 described below:

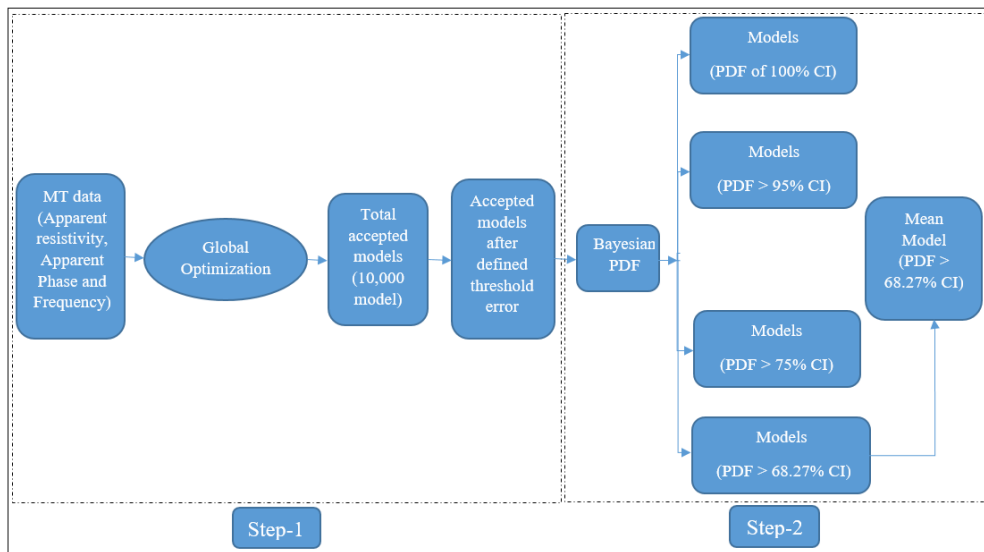

133  
134 **Figure 1** Schematic diagram demonstrating the essential processes considered for joint modeling  
135 of metaheuristic global optimization (Step-1) and posterior PDF technique (Step-2) for obtaining  
136 the global model by utilizing the synthetic and field MT data

137

138 **3.1 Optimization and Error Estimation**

139 In the present study, we have implemented a new innovative global optimization technique known  
140 as wPSOGSA, in which swarm particles and mass particles provide the best particle, i.e., the best  
141 model. The best model is chosen based on the fitness of the particles, and the cost function or  
142 objective function is used to estimate this fitness. Thus magnetotelluric (MT) inverse problem can  
143 be formulated through the forward modelling operator,  $f$ , aim at achieving the resistivity model,

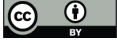

144 which illuminates the observed data  $\rho$  in the foremost. This operator combines the problem of  
145 physics and inverts the observed apparent resistivity data to the resistivity-depth model,  $\mathbf{x}$ , as

$$146 \quad (\rho, \varphi) = f(\mathbf{x}), \quad (7)$$

147 The cost function (fitness of the particle) is a mathematical relation between observed and  
148 calculated data and it is defined as the root mean square error (RMS):

$$149 \quad RMS = \sqrt{\left\{ \frac{(\rho - \rho_C)^2}{N} + \frac{(\varphi - \varphi_C)^2}{N} \right\}}, \quad (8)$$

150 Where  $N$  is the total observed data points,  $\rho$  and  $\varphi$  are the observed apparent resistivity and phase,  
151  $\rho_C$  and  $\varphi_C$  are the computed apparent resistivity and phase data.

152

### 153 3.2 Particle swarm optimization

154 The particle swarm optimization (PSO) technique is a widespread evolutionary optimization  
155 approach for determining the optimal global solution to a nonlinear inverse problem (Kennedy  
156 and Eberhart, 1995). This technique is analogous to the particle's natural behavior in search of  
157 food with the help of collaborative support from the model population represented by geophysical  
158 resistivity solutions/models (known as particles) in a swarming group. The best model/position  
159 obtained among the particles so far is stored for each iteration, which helps in search for the best  
160 solution, defined by the fitness of each particle estimated using Eq. (8). The particles' velocity and  
161 location in the search space are defined for  $k^{\text{th}}$  particle at  $t^{\text{th}}$  iteration is given below:

$$162 \quad v_k(t+1) = wv_k(t) + c_1 \times rand \times (x_p - x_k(t)) + c_2 \times rand \times (x_g - x_k(t)), \quad (9)$$

$$163 \quad x_k(t+1) = x_k(t) + v_k(t+1), \quad (10)$$

164 where  $w$  is the inertia weight set in between 0 and 1,  $c_1$  and  $c_2$  are a personal learning coefficient  
165 and a global learning coefficient, respectively,  $v_k(t)$  is the velocity of the  $k^{\text{th}}$  particle at  $t^{\text{th}}$  iteration,  
166 and  $rand$  is used for a random number between 0 and 1,  $x_p$  is the present best solution.  $x_g$  is the  
167 global best solution,  $x_k(t)$  is the position of the  $k^{\text{th}}$  particle at  $t^{\text{th}}$  iteration. Particles change their



168 position at each iteration to approach an optimum solution. The first, second, and third terms in  
169 Eq. (9) represent exploratory ability, private thought, and particle collaboration, respectively.

170

### 171 3.3 Gravitational search algorithm

172 The gravitational search algorithm (GSA) is a meta-heuristic algorithm based on Newton's  
173 gravitational law (Rashedi et al., 2009), which states that mass particles attract each other with a  
174 gravitational force that is directly proportional to the product of their masses and inversely  
175 proportional to the square of the distance between them. It signifies that massive particles (here,  
176 particle represents the resistivity layer model/solution) attract to the neighboring lighter particles.  
177 Similar to PSO, the Gravitational search optimizer works with a population of particles known as  
178 mass particles in the universe. Thus the best model/solution/particle is achieved among the mass  
179 particles. The best model is defined by each particle's capability (i.e., the fitness) calculated using  
180 Eq. (8). The initialization of their position in the search spaces is given by

$$181 \quad x = rand(N, D) \times (up - down) + down, \quad (11)$$

182 Where  $N$ ,  $D$  are the number of particles/models, the dimension of the model; and  $up$ , and  $down$   
183 are the upper and lower limit of the search range, respectively.

184 During execution time, the gravitational acting force on agent  $k^{th}$  from agent  $j^{th}$  at a specific  
185 time ( $t$ ) is defined as

$$186 \quad F_{k,j}(t) = G(t) \frac{M_{p,k}(t) * M_{a,j}(t)}{R_{k,j}(t) + \epsilon} (x_j(t) - x_k(t)), \quad (12)$$

187 Where,  $M_{a,j}$ , and  $M_{p,k}$  are the active and passive gravitational masses for particle  $j$  and  $k$ ,  
188 respectively,  $x_j(t)$  is the position of the particle  $j$  at a time  $t$  for various parameters,  $R_{k,j}(t)$  is  
189 Euclidian distance between two particles, and  $\epsilon$  is a small constant.

190 Here, gravitational constant  $G(t)$  at a specific time  $t$  is defined as (Kunche et al., 2015)  
191 and acceleration of  $k^{th}$  agent at  $t^{th}$  iteration for models is  $ac_k(t)$  is defined as:

$$192 \quad ac_k(t) = \frac{F_k(t)}{M_k(t)}, \quad (13)$$





193 Where the gravitational acting force on agent  $k$  from agent  $j$  and  $M_k(t)$  is the mass of the object at  
194 a specific time ( $t$ ).

$$195 \quad G(t) = G_0 \times \exp\left(-\alpha \times \frac{iter}{maxiter}\right), \quad (14)$$

196 Where  $\alpha$ ,  $G_0$ ,  $iter$ , and  $maxiter$  are descending coefficients, starting value of gravitational constant,  
197 current iteration, and maximum iterations, respectively.

198 The following equations are used to update the particle's velocity and location:

$$199 \quad v_k(t + 1) = rand \times v_k(t) + ac_k(t), \quad (15)$$

$$200 \quad x_k(t + 1) = x_k(t) + v_k(t + 1), \quad (16)$$

201 All the particles are randomly placed in the search range using Eq. (11) and then initializes the  
202 particle's velocity. Meanwhile, the gravitational constant, total forces and acceleration are  
203 computed, and the locations are updated. The end criteria is the misfit error (i.e.  $10^{-9}$ ) is taken in  
204 our study.

205

### 206 **3.4 Weighted hybrid PSO-GSA (wPSOGSA)**

207 The weighted hybrid of PSO and GSA algorithm known as the wPSOGSA algorithm integrates  
208 two essential characteristics, exploration (i.e., the ability of an algorithm to search the whole range  
209 of a given parameter) and exploitation (i.e., the ability to converge the solution nearest to the best  
210 solution) of the global optimization algorithm that increases its efficiency and converges the  
211 objective function to achieve global minima. The velocity and location of the particles updated in  
212 the wPSOGSA algorithm are illustrated in the schematic diagram (see Fig. 2).

213

214

215

216

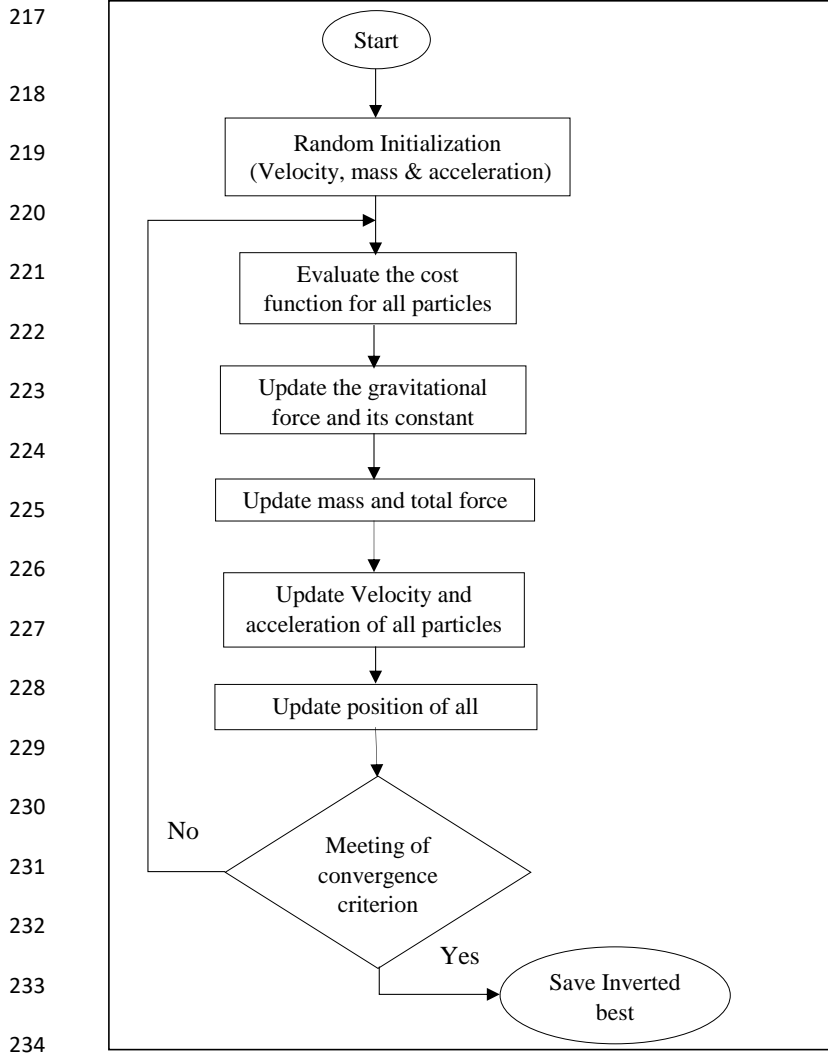

235 **Figure 2** Flow chart of the weighted hybrid Particle Swarm Optimization and Gravity Search  
 236 Algorithm known as the wPSOGSA algorithm (After (Mirjalili and Hashim, 2010))

237 The wPSOGSA combines the characteristic of social thinking of PSO and the searching  
 238 capability of GSA; thus, the particle’s velocity is defined as

239 
$$v_k(t + 1) = w \times v_k(t) + c_1 \times rand \times ac_k(t) + c_2 \times rand \times (x_g - x_k(t)) , \quad (17)$$

240 Where  $v_k(t)$  is the velocity of the particle  $k$  at iteration  $t$ ,  $w$  is the weight function (i.e., the constant  
 241 which helps to control the momentum of the algorithm to perform optimization properly),  $ac_k(t)$



242 is the acceleration of agent  $k$ ,  $x_g$  is the best solution, and the  $\text{rand}$  is a random number lies between  
243 0 and 1. At each iteration, particles updated their location to achieve the best solution defined as

$$244 \quad x_k(t+1) = x_k(t) + v_k(t+1), \quad (18)$$

245 The algorithm starts by randomly initializing the velocity, mass, and acceleration of the  
246 particles. The cost function is evaluated for all particles for specified iterations to get the most  
247 optimal solution, and inverted results are updated at each iteration. Equation (12), (17), and (18)  
248 are used to update the gravitational force, velocity, and location of particles after initialization.  
249 However, the velocity and position stop updating their values when the algorithm converge and  
250 reaches the least error of the cost function.

251

### 252 **3.5 Bayesian probability density function**

253 In a Bayesian framework, the probability distribution of the model parameters (known as posterior  
254 probability distribution) is computed using given observed data and models obtained from  
255 inversion. The posterior for a model is calculated using Bayes' theorem and previous model space  
256 information. Individual model parameter ranges are incorporated in the prior knowledge. The two  
257 fundamental stages in the Bayesian statistics method are the representation of previous knowledge  
258 as a probability density function and calculating the likelihood functional derived from data misfit  
259 (Tarantola and Valette, 1982). Specific characteristics, such as the best fitting model, mean model,  
260 and correlation matrix may be determined from posterior distribution of models. According to the  
261 Bayes' theorem,

$$262 \quad \text{Posterior} = \text{prior} \times \text{likelihood}, \quad (19)$$

263 As a result, our priori distribution function for the parameter,  $x_u$ , mean priori information,  $M$ , and  
264  $t^2$  is the mean uncertainty ( $\mu$ ) is defined as

$$265 \quad f(\mu) = \frac{1}{\sqrt{2\pi t^2}} \exp\left\{-\frac{(x_u - M)^2}{2t^2}\right\}, \quad (20)$$

266 and likelihood function is



267 
$$f(X|\mu) = \prod_{u=1}^n \frac{1}{\sqrt{2\pi\sigma^2}} \exp\left\{-\frac{(x_u-\mu)^2}{2\sigma^2}\right\}, \quad (21)$$

268 Hence the posterior density function calculated for a parameter ( $x_u$ ) using mean ( $\mu$ ) and variance  
 269 ( $\sigma^2$ ) defined (Lynch, 2007) as

270 
$$f(\mu|X) = \frac{1}{\sqrt{t^2\sigma^2}} \exp\left\{\frac{-(\mu-M)^2}{2t^2} + \frac{\sum_{u=1}^n (x_u-\mu)^2}{2\sigma^2}\right\} \quad (22)$$

271 The posterior Bayesian PDF is calculated from accepted models within a set of parameters, as  
 272 shown below:

273 
$$P(X|E) = \frac{P(X)L(E|X)}{\sum_X P(X)L(E|X)}, \quad (23)$$

274 Where,  $P(X|E)$  is the posterior probability distribution of the parameter (X) given the evidence  
 275 (E),  $P(X)$  is the prior information of (X) and  $L(E|X)$  is the likelihood function of X.

276 After the application of PDF, the study is further proceeded by choosing Confidence  
 277 Interval (CI) of 68.27 % that is based on the empirical rule, known as the 68-95-99.7 rule (Ross,  
 278 2009). The model parameters below 68.27 % CI are discarded, and the remaining parameters are  
 279 used for determining the mean model and uncertainty. Thus, the mean model ( $P_j$ ) is calculated  
 280 using the best models having PDF within a 68.27 % CI, defined in the following equation:

281 
$$P_j = \exp\frac{1}{Nd} \sum \ln(P_{j,k}), \quad (24)$$

282 Here accepted models are used to calculate the correlation matrix (i.e., correlation among  
 283 model parameters lie between -1 and 1) using the following equation (Tarantola, 2005):

284 
$$CovP(l,j) = \frac{1}{Nd} \sum (P_{l,k} - P_l) (P_{j,k} - P_j), \quad (25)$$

285 and 
$$CorP(l,j) = \frac{CovP(l,j)}{\sqrt{CovP(l,l) \times CovP(j,j)}}, \quad (26)$$

286 Here,  $N$  is the total number of models,  $d$  is used for the number of the layer parameters,  $P_{j,k}$  is the  
 287  $j^{th}$  model parameter of  $k^{th}$  model where  $l$  and  $j$  both vary from 1 to  $d$  (number of layer parameters).

288  $CovP(l,j)$  is the covariance matrix between model parameter  $l$  and  $j$ ,  $P_{l,k}$  is the model parameter



289  $l^{\text{th}}$  model parameter of  $k^{\text{th}}$  model and  $CorP(l, j)$  is the correlation matrix between model parameter  
290  $l$  and  $j$ .

291

## 292 **4.0 Results and discussions**

293 Different MT datasets are utilized to evaluate the proposed wPSOGSA algorithm's effectiveness,  
294 sensitivity, stability, and robustness in outlining the genuine subsurface structure. These datasets  
295 are noise-free and Gaussian noise synthetic data produced for several geological formations, and  
296 two MT field data have been optimized for analysis.

297

### 298 **4.1 Application to synthetic MT data-Three layers case**

299 To demonstrate and evaluate the robustness of the present algorithms, we have generated apparent  
300 resistivity and apparent phase synthetic MT data without noise and with noise levels (10 % and  
301 20 % noise) considering a three-layer typical continental crustal model with a total thickness of  
302 33000 m (i.e., 33.0 km) having a resistivity of middle crust 5000.0  $\Omega\text{m}$  with 18000 m (i.e., 18.0  
303 km) thickness (reasonable low resistive layer) and resistivity of upper-crust 30000.0  $\Omega\text{m}$  with  
304 15000 m (i.e., 15 km) thickness (high resistive layer) underlain by 1000  $\Omega\text{m}$  (low resistive) half  
305 space taken from Shaw & Srivastava (2007).

306 This synthetic MT data that was executed for 10000 runs keeping the same lower and upper  
307 bounds as given in Table 1, and iteration to 1000. Figure 3 shows (a) the observed apparent  
308 resistivity with the computed data, (b) the observed apparent phase with the computed data, (c)  
309 1D inverted model by wPSOGSA (red color), GSA (green color) and PSO (blue color) with a true  
310 model (black color), and 2(d) shows the relation between misfit and iterations for the noise-free  
311 synthetic data.

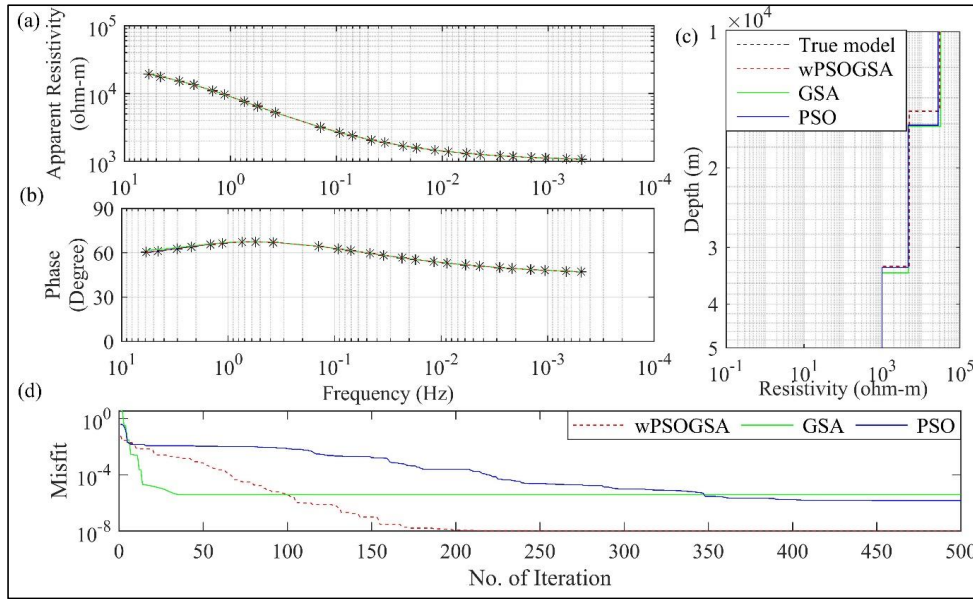

312

313 **Figure 3** The inverted MT response by PSO (blue color), GSA (green color), and hybrid  
 314 wPSOGSA (red color) with a true model (black color) over three-layer synthetic data as shown in  
 315 (a) observed and calculated apparent resistivity curve, (b) observed and calculated apparent phase  
 316 curve, (c) 1D depth inverted model, and (d) misfit error versus iterations

317 The misfit curve as shown in Fig. 3(d) is gradually decreasing with increasing iterations  
 318 and becomes constant, where the algorithm converges. The PSO, GSA, and wPSOGSA converge  
 319 at iterations 492, 35, and 316 with associated errors  $1.51e-6$ ,  $3.97e-6$ , and  $1.035e-8$ , and the  
 320 associated computational time is 27.06 seconds, 1.75 seconds, and 3.35 seconds, respectively.  
 321 Thus the curves describes that wPSOGSA converges at the least RMS error. Whereas PSO, GSA,  
 322 and wPSOGSA using 10 % noisy synthetic data converge at 102, 88, and 358 iterations with an  
 323 associated error are 0.00435, 0.00439, and 0.00426, and associated computational times are 5.61  
 324 seconds, 4.40 seconds, and 3.80 seconds, respectively.

325 Figure 4 presents the 20 % noisy synthetic MT data that was executed for 10000 runs  
 326 keeping the same lower and upper bounds, and iteration to 1000. The well fitted inverted MT  
 327 response (see Fig. 4) as follows: (a) the corrupted synthetic and calculated apparent resistivity

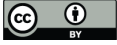

328 data, (b) the corrupted synthetic and calculated apparent phase data, (c) the inverted 1D depth  
329 model, and (d) convergence response in terms of misfit error versus iterations. We analyzed Fig.  
330 4(d) and found that the PSO, GSA, and wPSOGSA using noisy synthetic data converge at  
331 iterations 236, 7, and 73 with associated errors 0.0394, 0.0408, and 0.0393, respectively.  
332

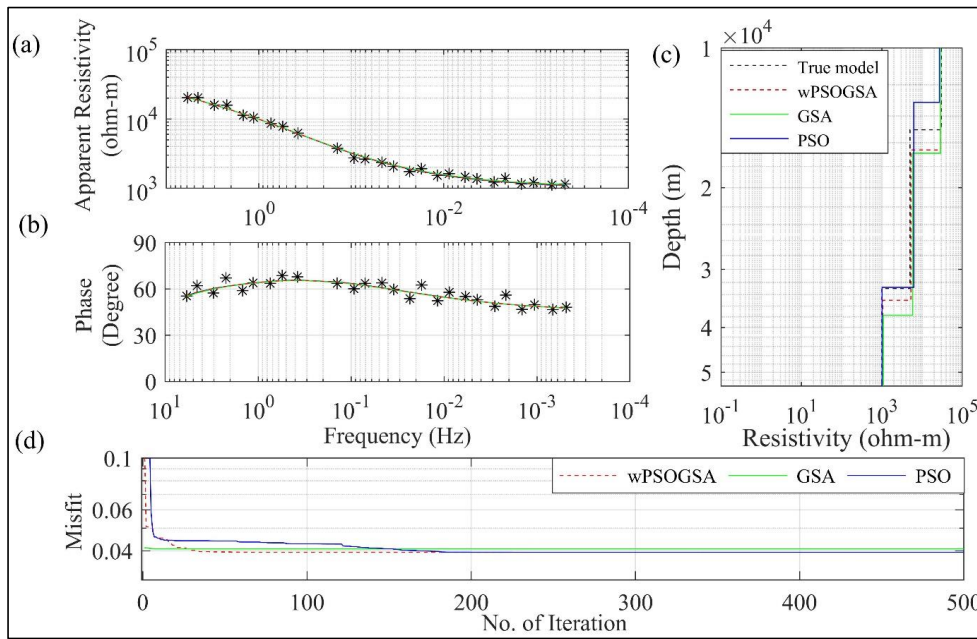

333  
334 **Figure 4** The inverted MT response by PSO (blue color), GSA (green color), and hybrid  
335 wPSOGSA (red color) with a true model (black color) over three-layer synthetic data with 20 %  
336 random noise as shown in (a) observed and calculated apparent resistivity curve, (b) observed and  
337 calculated apparent phase curve, (c) 1D depth inverted model, and (d) misfit error versus iterations

338

#### 339 4.1.1 Bayesian analysis and uncertainty in model parameters

340 Two methods are used to estimate mean solution and uncertainty: one method is the mean solution  
341 for all accepted best-fitted solutions acquired from 10,000 runs for all three global optimization  
342 techniques; another method is the model derived from all approved solutions using posterior

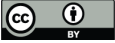

343 Bayesian PDF within one standard deviation. To get the global best solutions in our study, we  
 344 incorporated posterior PDF based on the Bayesian approach to enhance the efficacy of the inverted  
 345 model and minimize the uncertainty in the model. The process for obtaining the mean solution is  
 346 proceeded by selecting an initial threshold error which is essential because the smaller the  
 347 threshold value, the more significant number of models with lesser uncertainty in the model  
 348 parameters (Sharma, 2012). Thus, a more considerable threshold gives a lesser number of models  
 349 with enormous uncertainty in the model parameter (Sen and Stoffa, 1996; Sharma, 2012). This is  
 350 further proceeded by calculating the PDF for each parameter value using Eq. (22). In order to  
 351 select values of each parameter that having higher posterior PDF, a 68.27 % CI is used. The mean  
 352 model obtained from selected model parameters is near to the actual model.

353 Figure 5 shows the output of posterior Bayesian PDF, which select model parameters  
 354 with lesser error. The straight lines (dashed lines) present the actual value of the respective layer  
 355 parameters. The first layer thickness, second layer thickness, and first layer resistivity have  
 356 higher uncertainties, i.e., 61.25 m, 51.47 m, and 210.61  $\Omega\text{m}$ , respectively, whereas the second  
 357 layer resistivity and third layer resistivity have lower uncertainty, i.e., 17.71  $\Omega\text{m}$  and 0.03  $\Omega\text{m}$ ,  
 358 respectively.

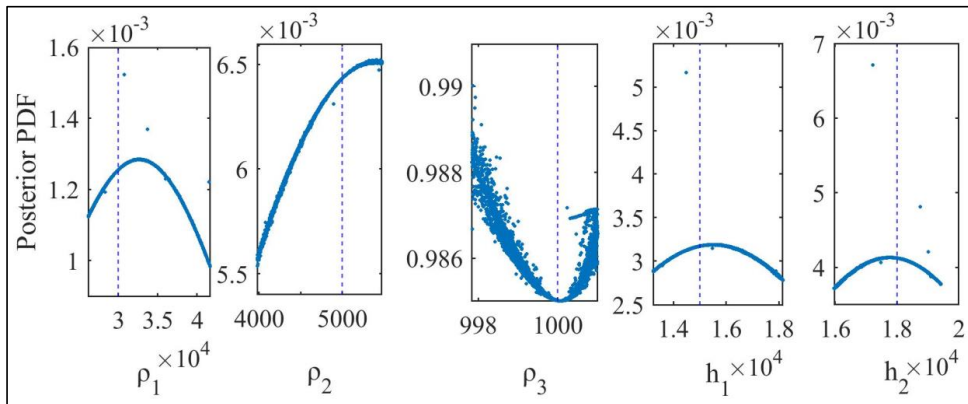

359  
 360 **Figure 5** Posterior Bayesian probability density function (PDF) with 68.27 % CI for wPSOGSA  
 361 for three-layered synthetic data





362 **Table 1** True model, search range, and inverted layer parameters by hybrid wPSOGSA, GSA, and  
 363 PSO for three-layer with different noise (0 %, 10 %, and 20 %) synthetic MT apparent resistivity  
 364 and apparent phase data.

| Layer parameters                                               |         | $\rho_1$<br>( $\Omega\text{m}$ ) | $\rho_2$<br>( $\Omega\text{m}$ ) | $\rho_3$<br>( $\Omega\text{m}$ ) | $h_1$<br>(m)    | $h_2$<br>(m)    |
|----------------------------------------------------------------|---------|----------------------------------|----------------------------------|----------------------------------|-----------------|-----------------|
| True model                                                     |         | 30000                            | 5000                             | 1000                             | 15000           | 18000           |
| Search Range                                                   |         | 5000 -<br>50000                  | 1000 -<br>10000                  | 50 -<br>5000                     | 5000 -<br>25000 | 10000-<br>25000 |
| (Shaw &<br>Srivastava, 2007)<br>2.0 % Gaussian<br>random noise | PSO     | 26981.80                         | 6230.30                          | 1011.70                          | 13090           | 19720           |
|                                                                | GA      | 40800                            | 10000                            | 1010                             | 6210            | 25000           |
|                                                                | RR      | 43424.40                         | 3097.10                          | 980.70                           | 17010.00        | 16960.00        |
| 0 % noisy data                                                 | PSO     | 27463.86                         | 4664.57                          | 999.48                           | 16112.66        | 17080.01        |
|                                                                | GSA     | 32017.78                         | 4721.69                          | 1004.05                          | 16195.26        | 17928.07        |
|                                                                | wPSOGSA | 30243.42                         | 5007.04                          | 1000.02                          | 14969.33        | 18029.76        |
| 10 % noisy data                                                | PSO     | 19861.54                         | 7659.73                          | 1022.19                          | 15971.66        | 14774.31        |
|                                                                | GSA     | 27538.91                         | 6534.61                          | 1018.04                          | 14117.82        | 17408.14        |
|                                                                | wPSOGSA | 27589.85                         | 6043.87                          | 998.99                           | 14902.89        | 18221.87        |
| 20 % noisy data                                                | PSO     | 26981.8                          | 6230.3                           | 1011.7                           | 13090.00        | 19720.00        |
|                                                                | GSA     | 28823.57                         | 5825.19                          | 1089.65                          | 16861.84        | 20795.48        |
|                                                                | wPSOGSA | 29208.75                         | 5282.77                          | 1055.09                          | 16573.22        | 18398.94        |

365

366 Table 1 shows the inverted layer parameters using wPSOGSA, GSA, and PSO for noise-  
 367 free and noisy synthetic MT databased on posterior Bayesian PDF, as well as the actual model and  
 368 the search range. In addition, layered properties of synthetic data corrupted with 10 % and 20 %  
 369 random noise are compared and statistically analyzed. Our findings, as shown in Table 1, were  
 370 compared to those obtained using the Genetic Algorithm (GA), Ridge Regression (RR), and PSO



371 by Shaw & Srivastava (2007), which consistently outperforms GA and RR is closer to the genuine  
372 model.

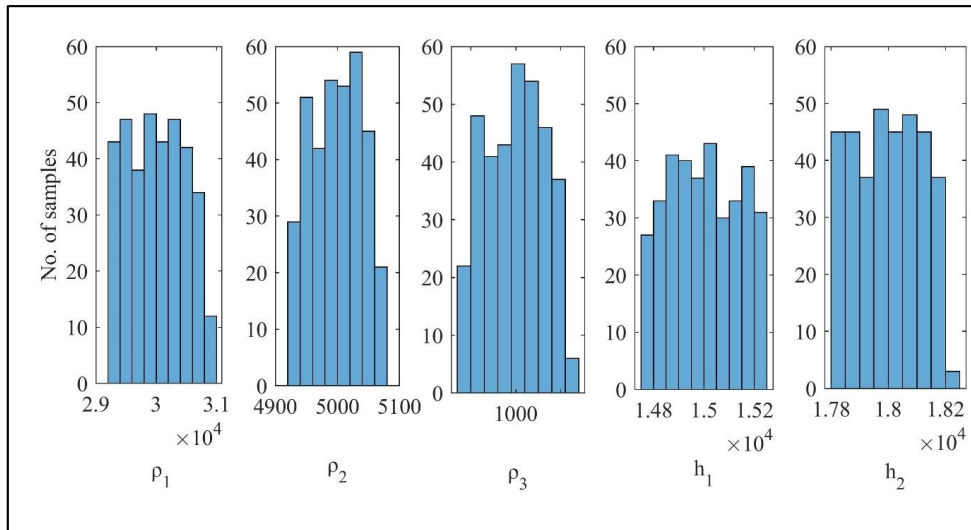

373

374 **Figure 6** Histogram of selected models for misfit error below a defined threshold error of  
375 wPSOGSA

376 Mean value of the accepted model parameters ( $30243.42 \pm 471.26$ ,  $5007.04 \pm 39.59$ ,  
377  $1000.02 \pm 0.064$ ,  $14969.33 \pm 136.82$ ,  $18029.76 \pm 114.90$ ) with high uncertainty of the parameters (1.5  
378 %, 0.78 %, 0.0064 %, 0.91 %, and 0.63 %). On the basis of low posterior PDF and high  
379 uncertainty, we have taken ( $\rho_1$ ) and ( $h_1$ ) for the exercise to show the models are not biased to the  
380 selected models.

381 As well as based on the histograms (see Fig. 6), posterior PDF and uncertainty of the  
382 inverted layer parameters resistivity ( $\rho_1$ ) and thickness ( $h_1$ ) for the three-layered synthetic MT data  
383 have been taken to depict the global solution using presented algorithm. Here we prepared the  
384 cross-plots of  $\rho_1$  versus  $h_1$  using (a) wPSOGSA, (b) PSO, and (c) GSA, showing all accepted  
385 models (red circle), selected models with misfit error less than a threshold error of  $10^{-4}$  (magenta  
386 circle), models of a PDF greater than 95 % (blue circle), models of a PDF greater than 75 % (green



387 circle), models of a PDF greater than 68.27 % (yellow circle), and mean model, i.e., model  
 388 parameters which having a PDF greater than 68.27 % (black asterisk) as shown in Fig. 7. It is  
 389 noticed that the all inverted results give the global solution which has a good agreement with the  
 390 true model, whereas wPSOGSA gives the more accurate results than the other two algorithms PSO  
 391 and GSA as shown in Table 2.

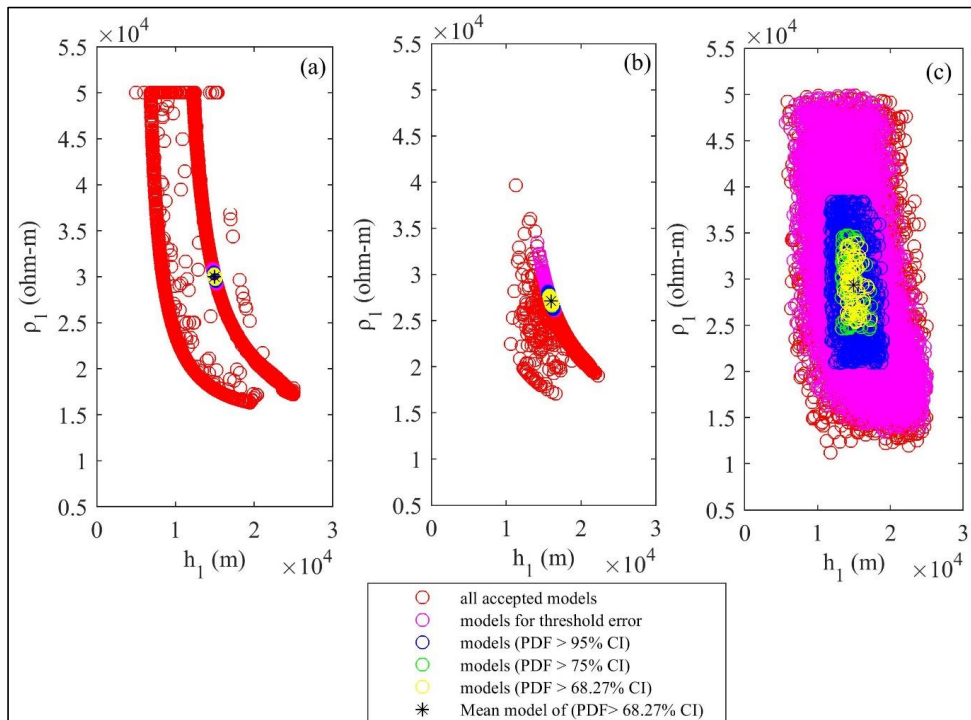

392 **Figure 7** Cross-plots of thickness and resistivity of first layer for the three-layered synthetic  
 393 resistivity model using (a) wPSOGSA, (b) PSO, and (c) GSA, displaying all accepted models (red  
 394 circle), selected models with misfit error less than a threshold error (magenta circle), models (pdf  
 395 > 95 % CI, blue circle), models (pdf > 75 % CI, green circle), models (pdf > 68.27 % CI, yellow  
 396 circle), and mean model i.e. model parameters which having a PDF greater than 68.27 % (black  
 397 asterisk)

399



400 **4.1.2 Sensitivity, correlation matrix, and model parameters**

401 The accepted models, which have posterior PDF value within 68.27 % CI, are used to calculate  
 402 the correlation matrix. This correlation matrix gives the relationship among model parameters.  
 403 Thus, the lesser correlation value gives weak relation among the parameters and vice versa. The  
 404 correlation matrix of PSO, GSA, and wPSOGSA was examined on one set of synthetic data, as  
 405 shown in Fig. 8, Fig. 9 and Fig. 10, demonstrating the sensitivity among inverted model  
 406 parameters. The value of correlation matrix 1.0 indicates that the two parameters are strongly  
 407 correlated.

408 Figure 8 shows that first layer resistivity is correlated highly positively with a first-layer  
 409 thickness (0.97) and second layer thickness (0.98), while the second layer resistivity (-0.99) and  
 410 third layer resistivity (-0.81) are substantially negative connected. Second layer resistivity is  
 411 correlated with the third layer resistivity (0.87) which has a significant positive relationship; while  
 412 second layer resistivity has a significant negative correlation with the first layer thickness (-0.99)  
 413 and the second layer thickness (-1.00). First layer thickness (-0.92) and second layer thickness (-  
 414 0.90) are very negatively associated with third layer resistivity, while first layer thickness is  
 415 extremely positively correlated with a second layer thickness (0.99).

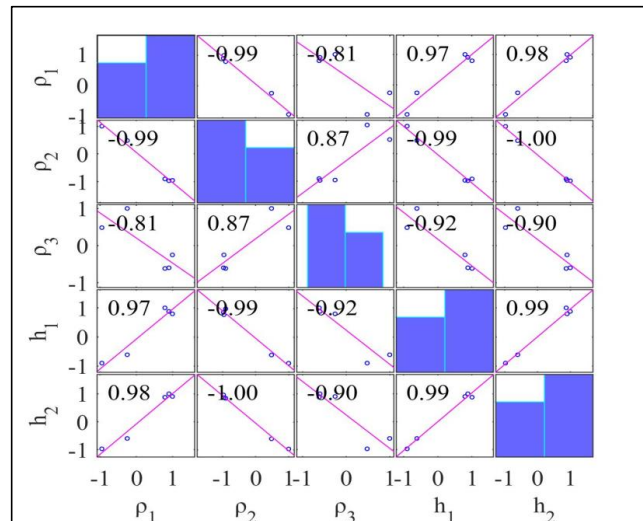

416



417 **Figure 8** Correlation matrix calculated from PSO inverted model using a three-layer noise-free  
 418 synthetic MT apparent resistivity and apparent phase data

419

420 Figure 9 indicates that first layer resistivity is highly associated with a second layer  
 421 thickness (1.00) and weakly with second layer resistivity (-1.00), third layer resistivity (-1.00),  
 422 and first layer thickness (-1.00). Second layer resistivity (-1) is highly linked with a second layer  
 423 thickness (-1.00), while third layer resistivity (1.00) and first layer thickness are strongly  
 424 correlated (1.00). Third layer resistivity has a highly positive correlation with a first-layer  
 425 thickness (1.00) and a strong negative correlation with a second layer thickness (-1.00), whereas  
 426 first layer thickness has a significant negative correlation with a second layer thickness (-1.00).

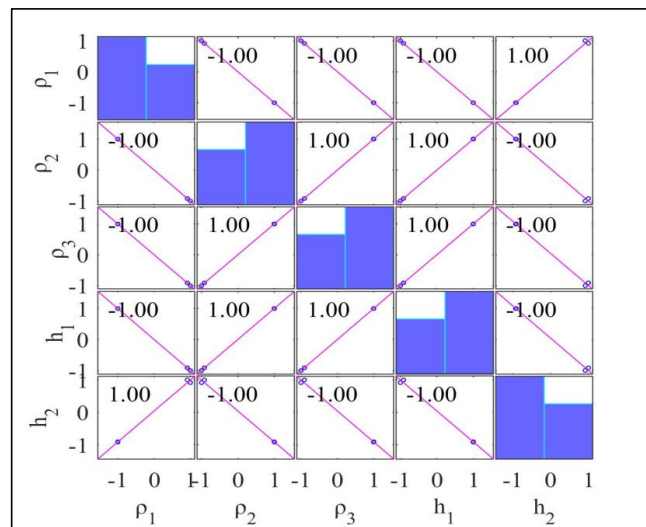

427

428 **Figure 9** Correlation matrix calculated from GSA inverted model using a three-layer noise-free  
 429 synthetic MT apparent resistivity and apparent phase data

430

431 Figure 10 shows the correlation matrix of wPSOGSA. The analyses reveal that the first  
 432 layer resistivity is strongly negative with the second layer resistivity, substantially negative (-0.92)  
 433 with the third layer resistivity, weakly positive (0.30) with the first layer thickness, and



434 considerably (0.63) with the second layer thickness. Second layer resistivity is slightly positive  
 435 (0.31) when compared to third layer resistivity (0.43) but substantially negative when compared  
 436 to first layer thickness. Third layer resistivity has a slightly negative correlation (-0.23) with first  
 437 layer thickness, but a moderately negative correlation (-0.71) with second layer thickness and first  
 438 layer thickness has a negative correlation (-0.71). Thus the conclusion can be made that the layer  
 439 parameters are independent of others, so changing one will have no effect on the other compared  
 440 to the result obtained via PSO and GSA algorithms.

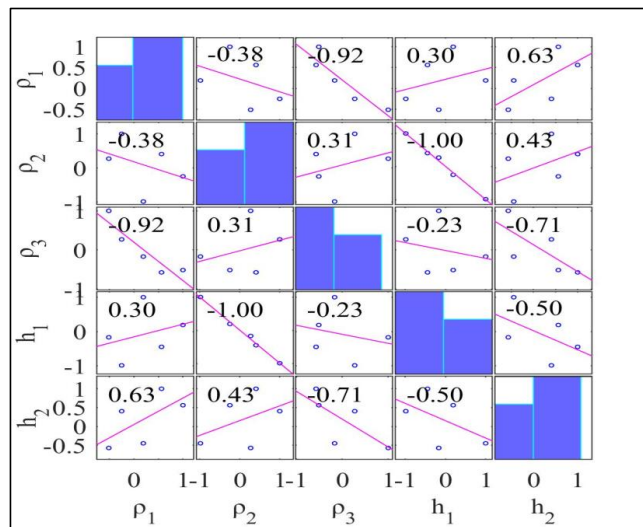

441

442 **Figure 10** Correlation matrix calculated from wPSOGSA inverted model using a three-layer  
 443 noise-free synthetic MT apparent resistivity and apparent phase data

444

#### 445 4.1.3 Stability analysis

446 We used two different search ranges for stability evaluation of proposed wPSOGSA algorithms  
 447 and executed the algorithms over three layers of synthetic MT data. One of which is expanded,  
 448 and the other is contracted by 10 % of the initial search range. We infer from three layers of  
 449 synthetic data, results fluctuate by approximately 3 % from the true value when the search range



450 is changed. This variation is about 10 % on average for synthetic data corrupted with 30 % random  
 451 noise, as shown in Table 2.

452 **Table 2** Stability analysis of a hybrid algorithm for three layers of synthetic data.

| Layer parameters          |      | $\rho_1$<br>( $\Omega\text{m}$ ) | $\rho_2$<br>( $\Omega\text{m}$ ) | $\rho_3$<br>( $\Omega\text{m}$ ) | $h_1$<br>(m)   | $h_2$<br>(m)    |
|---------------------------|------|----------------------------------|----------------------------------|----------------------------------|----------------|-----------------|
| Search Range              |      | 5000-<br>50000                   | 1000-<br>10000                   | 50-5000                          | 5000-<br>25000 | 10000-<br>25000 |
| Search Range - Case 1     |      | 4500-<br>55000                   | 900-<br>11000                    | 45-5500                          | 4500-<br>27500 | 9000-<br>27500  |
| wPSOGSA<br>inverted model | 0 %  | 31092.47                         | 5085.79                          | 1000.14                          | 14700.83       | 18251.85        |
|                           | 30 % | 30113.82                         | 5016.75                          | 1137.05                          | 15880.95       | 23970.22        |
| Search Range - Case 2     |      | 5500-<br>45000                   | 1100-<br>9000                    | 55-4500                          | 5500-<br>22500 | 11000-<br>22500 |
| wPSOGSA<br>inverted model | 0 %  | 29078.26                         | 4922.85                          | 999.91                           | 15273.25       | 17767.45        |
|                           | 30 % | 27815.97                         | 5464.88                          | 1156.46                          | 17398.41       | 18119.61        |

453

454 **4.2 Application to synthetic MT data-Four layers case**

455 For the second example of the synthetic data, a typical four-layer HK-type of earth model taken  
 456 from Xiong et al. (2018) is generated by forward modeling equations for demonstration of the  
 457 wPSOGSA, PSO, and GSA algorithms and compared their performance with Improved  
 458 Differential Evolution (IDE) results obtained by Xiong et al. (2018). Analysis over noisy synthetic  
 459 data is done by corrupting synthetic data with 10 % and 20 % Gaussian random noise to mimic  
 460 the real field data because different types of noises influence apparent resistivity data. Following  
 461 that, all three optimization methods are run using the noisy synthetic data. As the misfit error  
 462 increases with the noise in the data, the Bayesian PDF of 68.27 % CI is calculated with respect to  
 463 the threshold misfit error of 0.01 and thus the mean model is calculated.

464 Enormous uncertainty is shown in the inverted results; hence, we calculated the mean  
 465 model for 68.27 % CI using posterior Bayesian PDF to reduce the uncertainty and produce the



466 global best solution. The optimized results obtained from the posterior PDF and the true model  
 467 are shown in Table 3. Fig. 11 illustrate the inverted responses for PSO, GSA, and wPSOGSA are  
 468 well-fitting as follows (a) observed and calculated apparent resistivity data, (b) observed and  
 469 calculated apparent phase data, (c) 1-D depth model, and (d) convergence response of present  
 470 algorithms. We have estimated the layer parameters for synthetic data corrupted with 20 % random  
 471 noise for comparative analysis and found that the PSO, GSA, and wPSOGSA converge at  
 472 iterations 96, 556, and 187 with associated errors 3.69, 4.04, and 3.69, respectively.

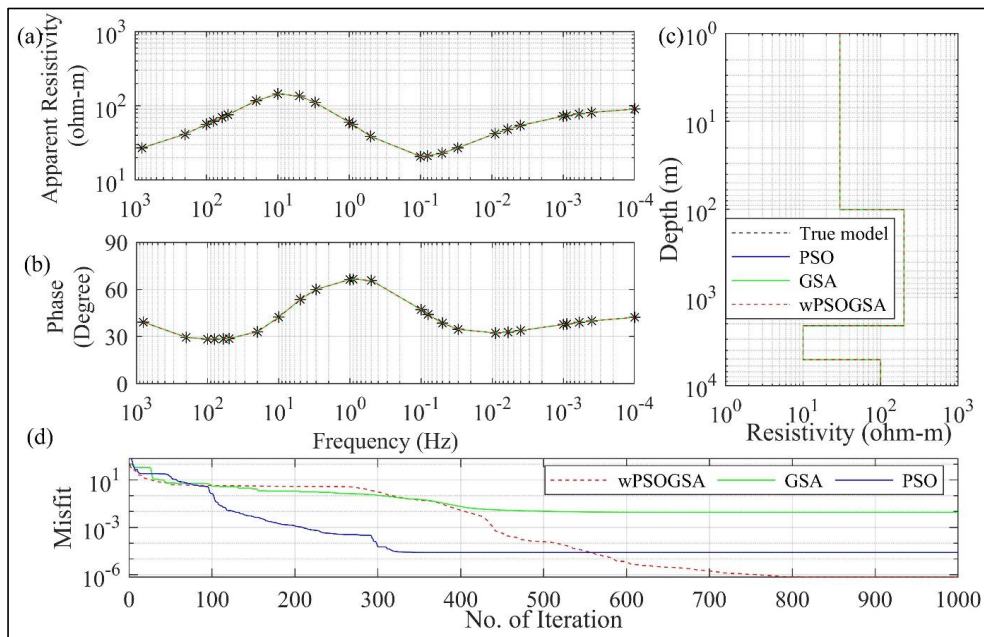

473  
 474 **Figure 11** The inverted MT response by PSO (blue color), GSA (green color), and hybrid  
 475 wPSOGSA (red color) with a true model (black color) over four-layer synthetic data as shown in  
 476 (a) observed and calculated apparent resistivity curve, (b) observed and calculated apparent phase  
 477 curve, (c) 1D depth inverted model and (d) convergence curve

478 Additionally, the synthetic data corrupted with 10 % random noise is also used and  
 479 executed inversion, keeping the search range, a number of particles, and iterations the same as  
 480 before and observed that the PSO, GSA, and wPSOGSA converge at iterations 151, 2 and 250





481 with associated error 1.7609, 1.95 and 1.76 respectively. The posterior Bayesian PDF for threshold  
 482 data with 68.27 % CI is calculated similarly as a three-layer case to minimize the uncertainty in  
 483 inverted results.

484

485 **Table 3** Comparison of the result obtained from improved Differential Evolution (IDE) and  
 486 inverted results of PSO, GSA, and hybrid wPSOGSA obtained by using posterior PDF for four-  
 487 layer synthetic apparent resistivity data with different Gauss noise levels (0 %, 10 %, and 20 %)  
 488 and True model.

| Layer parameters |         | $\rho_1$<br>( $\Omega\text{m}$ ) | $\rho_2$<br>( $\Omega\text{m}$ ) | $\rho_3$<br>( $\Omega\text{m}$ ) | $\rho_4$<br>( $\Omega\text{m}$ ) | $h_1$<br>(m) | $h_2$<br>(m) | $h_3$<br>(m) |
|------------------|---------|----------------------------------|----------------------------------|----------------------------------|----------------------------------|--------------|--------------|--------------|
| True model       |         | 30.00                            | 200.00                           | 10.00                            | 100.00                           | 100.00       | 2000.00      | 3000.00      |
| Search Range     |         | 25-35                            | 100-250                          | 5-15                             | 50-150                           | 50-200       | 1000-3000    | 2000-3500    |
| 0 % noise        | IDE     | 30.00                            | 200.00                           | 9.99                             | 100.01                           | 100.00       | 1991.98      | 3000.24      |
|                  | PSO     | 30.00                            | 200.001                          | 10.00                            | 100.00                           | 100.00       | 2000.00      | 3000.00      |
|                  | GSA     | 29.95                            | 199.79                           | 9.99                             | 99.99                            | 99.67        | 2000.70      | 2995.37      |
|                  | wPSOGSA | 30.00                            | 200.00                           | 10.00                            | 100.00                           | 100.00       | 2000.00      | 3000.00      |
| 10 % noise       | IDE     | 30.24                            | 210.28                           | 08.92                            | 99.67                            | 109.83       | 1994.63      | 2667.13      |
|                  | PSO     | 32.86                            | 224.99                           | 11.51                            | 107.65                           | 109.71       | 1971.78      | 3499.92      |
|                  | GSA     | 29.77                            | 209.78                           | 9.50                             | 106.78                           | 92.38        | 2073.14      | 2754.77      |
|                  | wPSOGSA | 30.46                            | 197.18                           | 9.97                             | 102.01                           | 100.50       | 1974.83      | 3079.35      |
| 20 % noise       | IDE     | 30.30                            | 212.41                           | 11.44                            | 97.92                            | 102.40       | 1930.17      | 3347.24      |
|                  | PSO     | 34.99                            | 247.04                           | 11.80                            | 114.56                           | 115.16       | 1986.08      | 3499.99      |
|                  | GSA     | 29.52                            | 225.61                           | 9.74                             | 113.46                           | 87.55        | 2081.26      | 2753.29      |
|                  | wPSOGSA | 34.88                            | 246.08                           | 11.75                            | 114.54                           | 114.58       | 1990.98      | 3489.10      |

489

490



491 **4.2.1 Stability analysis**

492 For the stability evaluation of presented algorithms over four layers of synthetic MT data, similar  
 493 to the three-layer case, we used two different search ranges and executed the algorithms for 1000  
 494 iterations. The method exhibits good results with four layers of synthetic data and reveals minimal  
 495 variation for noise-free data. For 30 % contaminated data, the variation is approximately 10 % and  
 496 12 % in case 1 and case 2, respectively. The outputs don't change much across runs and provide  
 497 consistent results, as shown in Table 4.

498

499 **Table 4** Stability analysis of a hybrid algorithm for four layers of MT synthetic data.

| Layer parameters    |      | $\rho_1$<br>( $\Omega\text{m}$ ) | $\rho_2$<br>( $\Omega\text{m}$ ) | $\rho_3$<br>( $\Omega\text{m}$ ) | $\rho_4$<br>( $\Omega\text{m}$ ) | $h_1$<br>(m) | $h_2$<br>(m) | $h_3$<br>(m) |
|---------------------|------|----------------------------------|----------------------------------|----------------------------------|----------------------------------|--------------|--------------|--------------|
| Search Range        |      | 25-35                            | 100-250                          | 5-15                             | 50-150                           | 50-200       | 1000-3000    | 2000-35000   |
| Search Range-Case 1 |      | 27.50-31.50                      | 110-225                          | 5.50-13.50                       | 55-135                           | 55-180       | 1100-2700    | 2200-3150    |
| wPSOGSA             | 0 %  | 29.99                            | 199.99                           | 10.00                            | 99.99                            | 99.99        | 1999.99      | 3000.00      |
| inverted model      | 30 % | 31.5                             | 220.79                           | 11.17                            | 109.18                           | 99.48        | 2150.07      | 3150         |
| Search Range-Case 2 |      | 22.50-38.50                      | 90-275                           | 4.50-16.50                       | 45-165                           | 45-220       | 900-3300     | 1800-3850    |
| wPSOGSA             | 0 %  | 29.99                            | 199.99                           | 10.00                            | 99.99                            | 99.99        | 1999.99      | 3000.00      |
| inverted model      | 30 % | 35.47                            | 264.27                           | 11.95                            | 103.13                           | 116.22       | 2020.37      | 3040.95      |

500

501 **4.3 Application to field MT data-Island of Milos, Greece**

502 We utilized the first example of field data from the Island of Milos, Greece. Milos is a part of the  
 503 South Aegean Active Volcanic Arc, an example of an emergent volcanic edifice (Stewart and  
 504 McPhie, 2006) formed by monogenetic effusive and explosive magmatism pulses. Milos is the  
 505 world's biggest exporter of bentonite, and it also has a diverse variety of metalliferous and non-  
 506 metalliferous mineral reserves. It's a conserved on-land laboratory for studying shallow



507 underwater hydrothermal ore-forming processes. The accompanying shallow subsurface  
508 hydrothermal venting fields have developed significantly less attention. ("Dawes, 1986) used  
509 magnetotelluric data to assess the resistivity structure of the geothermal area on Milos west side.  
510 With around 3.0 km spacing, 37 MT probes in the bandwidth of 100-0.01 Hz and 12 investigations  
511 in the bandwidth of 0.01-0.0001 Hz were installed along with various profiles that were  
512 perpendicular to the Zephyria graben in the W-E direction, as well as along the graben in S-N  
513 direction (Hutton et al. 1989). The location of the MT site and the geology of the study area are  
514 shown in Fig. 12.

515 In one-dimensional MT data for site G5 near borehole M2 (Hutton et al., 1989) the  
516 apparent resistivity and phase values are inverted using the wPSOGSA, PSO, and GSA, keeping  
517 the same set of controlling parameters as for noisy synthetic data, such as the swarm size, inertia  
518 weight ( $w$ ), personal learning coefficient ( $c_1$ ) and a global learning coefficient ( $c_2$ ), descending  
519 coefficient ( $\alpha$ ), and the initial value of universal gravitational constant ( $G_0$ ).

520 Figure 13 shows the calculated data and model parameters as (a) match between observed  
521 and computed apparent resistivity data, (b) match between observed and computed apparent phase  
522 data, and (c) 1D inverted model and (d) convergence response of wPSOGSA (red color), GSA  
523 (green color), and PSO (blue color) along with true model (black color). In subfigure Fig. 13(c)  
524 depicts alluvium deposits with a resistivity of  $1.0 \Omega\text{m}$  with 15 m thickness as the top layer, and  
525 volcanic deposits with a resistivity of  $300 \Omega\text{m}$  and 10 m thickness lie beneath the alluvium  
526 deposits. A very high conducting layer of resistivity less than  $1.0 \Omega\text{m}$  is estimated, equivalent to  
527 the green lahar under the high resistivity volcanic deposits. The next layer below, with higher  
528 resistivity, corresponds to the crystalline foundation. In the geothermal zone's depths, the  
529 resistivity drops again. The resistivity in the depth range of about 1000 m, which is similar to  
530 earlier studies, was explored, and the findings of the proposed algorithm discovered to be in good  
531 agreement with model developed by Dawes in Hutton et al. (1989).

532

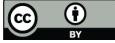

533

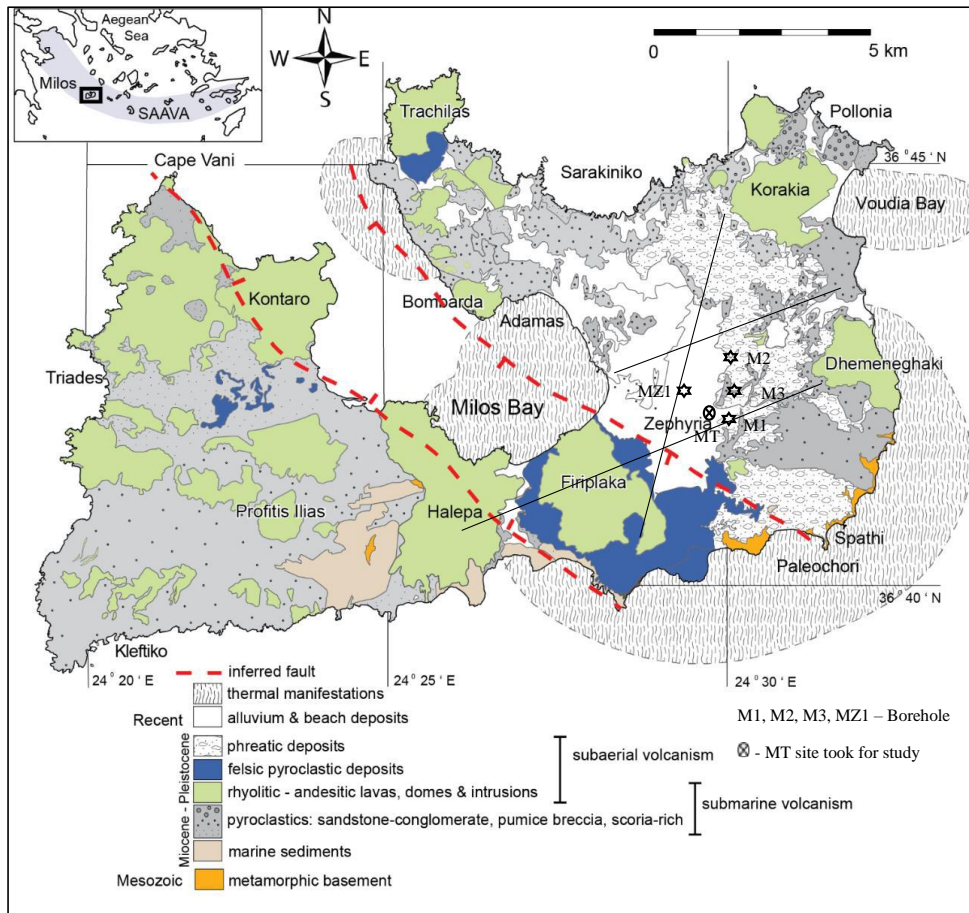

534 **Figure 12** The location of the MT site and geology of the Island of Milos, Greece (modified after  
535 (Stewart and McPhie, 2006))

536 In subfigure Fig. 13(d) reveals that the algorithms converge at iterations 218, 1, and 425  
537 with corresponding errors of 0.0494, 0.0518, and 0.0493 for PSO, GSA, and wPSOGSA,  
538 respectively. The hybrid algorithm has the least error between observed and computed data. The  
539 algorithms are executed for 1000 iterations and 10000 models, and findings are compared with  
540 available stratigraphy, and the result is derived using the Monte-Carlo technique by Hutton et al.  
541 (1989). After examining our optimized effects from Fig. 13 and Table 5, hybrid wPSOGSA  
542 outperformed PSO and GSA.

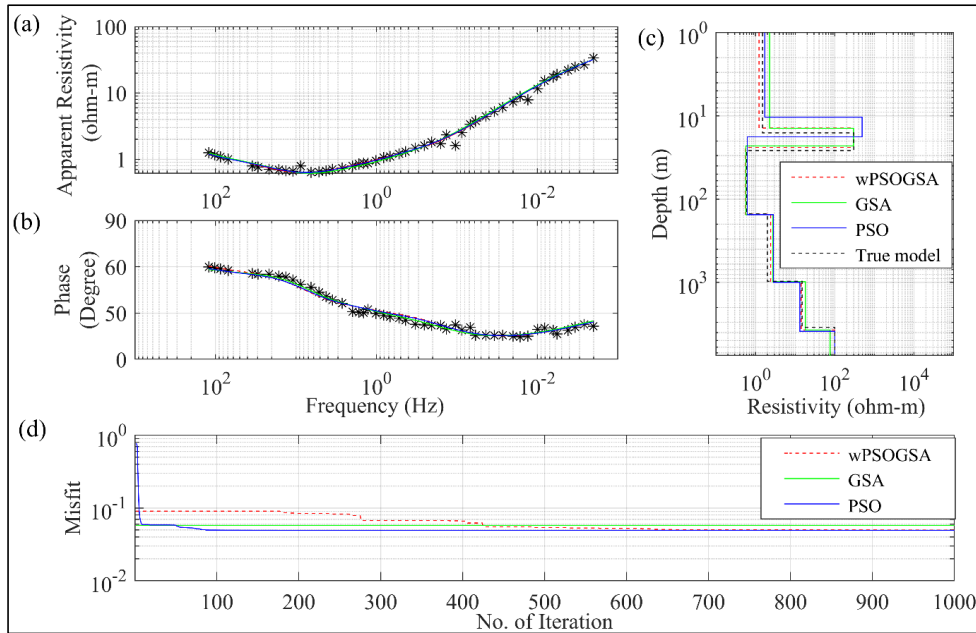

543

544 **Figure 13** The inverted MT response by PSO (blue color), GSA (green color), and hybrid  
 545 wPSOGSA (red color) with a true model (black color) over the geothermal area, Island of Milos,  
 546 Greece, as shown in (a) observed and calculated apparent resistivity curve, (b) observed and  
 547 calculated apparent phase curve, (c) 1D depth inverted model and (d) convergence curve

548

549 **4.3.1 Bayesian analysis and uncertainty in model parameters**

550 A posterior Bayesian method determines the global model and related uncertainty. Figure 14  
 551 shows another uncertainty study that examined the six-layered resistivity model over the  
 552 geothermal field, Island of Milos, Greece, and found that the peak values of the posterior PDF for  
 553 all model parameters are very nearer to the actual value of the layer parameters, providing less  
 554 uncertainty. We have analyzed the wPSOGSA inverted results from the Fig. 14 and Table 5 and  
 555 found that the first, second, third, fourth, fifth, and sixth layers' resistivity with uncertainty in  
 556 associated layer parameters is  $1.23 \pm 0.49 \Omega\text{m}$ ,  $297.61 \pm 53.43 \Omega\text{m}$ ,  $0.55 \pm 0.02 \Omega\text{m}$ ,  $2.41 \pm 0.16 \Omega\text{m}$ ,  
 557  $14.18 \pm 1.76 \Omega\text{m}$ , and  $99.92 \pm 0.37 \Omega\text{m}$ . Similarly, the associated thicknesses with uncertainty are

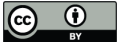

558 14.51±1.35 m, 9.85±1.35 m, 127.39±6.01 m, 823.01±7.57 m, and 2750.88±63.07 m. Thus, the  
559 analysis suggests the lesser uncertainties in each layer's parameters except resistivity of the first  
560 and second layers.

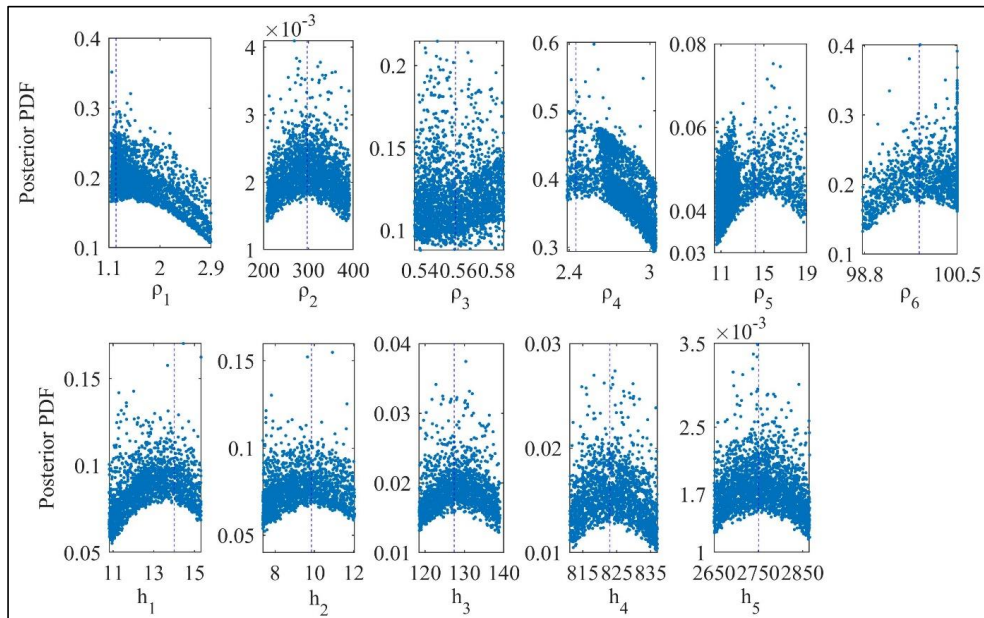

561

562 **Figure 14** Posterior Bayesian probability density function (PDF) with 68.27 % CI for  
563 wPSOGSA over a geothermal field, Island of Milos, Greece

564

565 Table 5 compares optimized results obtained from all three presented algorithms based  
566 on posterior Bayesian PDF under 68.27 % CI condition. However, the 1D depth model inverted  
567 from wPSOGSA shows good agreement with the available borehole M-2 (Hutton et al., 1989).  
568 As a result, the hybrid algorithm is functioning better, and the findings are encouraging.

569

570

571

572

573



574 **Table 5** Search range and inverted results by posterior PDF (68.27 % CI) and PSO, GSA, and  
 575 hybrid wPSOGSA for six-layered field data.

| Layer parameters |         | $\rho_1$             | $\rho_2$             | $\rho_3$             | $\rho_4$             | $\rho_5$             | $\rho_6$             | $h_1$     | $h_2$    | $h_3$       | $h_4$       | $h_5$         |
|------------------|---------|----------------------|----------------------|----------------------|----------------------|----------------------|----------------------|-----------|----------|-------------|-------------|---------------|
|                  |         | ( $\Omega\text{m}$ ) | ( $\Omega\text{m}$ ) | ( $\Omega\text{m}$ ) | ( $\Omega\text{m}$ ) | ( $\Omega\text{m}$ ) | ( $\Omega\text{m}$ ) | (m)       | (m)      | (m)         | (m)         | (m)           |
| Search Range     |         | 0.1-<br>5            | 50-<br>500           | 0.1-<br>5            | 1-<br>10             | 10-<br>30            | 50-<br>100           | 10-<br>20 | 5-<br>15 | 110-<br>150 | 800-<br>850 | 2500-<br>3000 |
| Mean             | PSO     | 1.71                 | 493.81               | 0.62                 | 2.82                 | 13.22                | 99.97                | 10.39     | 7.44     | 135.4       | 843.77      | 2861.35       |
|                  | GSA     | 2.28                 | 299.28               | 0.54                 | 2.76                 | 18.25                | 76.03                | 14.08     | 8.81     | 130.75      | 825.32      | 2753.07       |
| Posterior        | wPSOGSA | 1.23                 | 297.61               | 0.55                 | 2.41                 | 14.18                | 99.92                | 14.51     | 9.85     | 127.39      | 823.01      | 2750.88       |

576

577 **4.3.2 Sensitivity, correlation matrix, and model parameters**

578 Here a similar study of the correlation matrix is carried out for field example from the Island of  
 579 Milos, Greece using all accepted models, which have posterior PDF values within 68.27 % CI.  
 580 The correlation matrix of PSO, GSA, and wPSOGSA was examined over the field MT data as  
 581 shown in Fig. 15, Fig. 16 and Fig. 17 demonstrating the sensitivity among inverted model  
 582 parameters and found an almost similar correlation among the layer parameters for three-layer  
 583 synthetic study. From correlation analyses, we noticed that the values are showing moderate and  
 584 weak correlation among parameters in the wPSOGSA case, indicating that wPSOGSA is linearly  
 585 independent of layer parameters, while PSO and GSA are more reliant, so changing one parameter  
 586 will show less effect on the other. This indicates that the parameter is less affected by other layer  
 587 parameters and resistivity curves. Whereas the correlation among layer parameters for field data  
 588 using GSA is either strongly positive or strongly negative, which describes that the parameters are



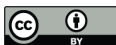

589 dependent on each other. Thus a change in one parameter affects the other, and also apparent  
 590 resistivity curve is very much involved.

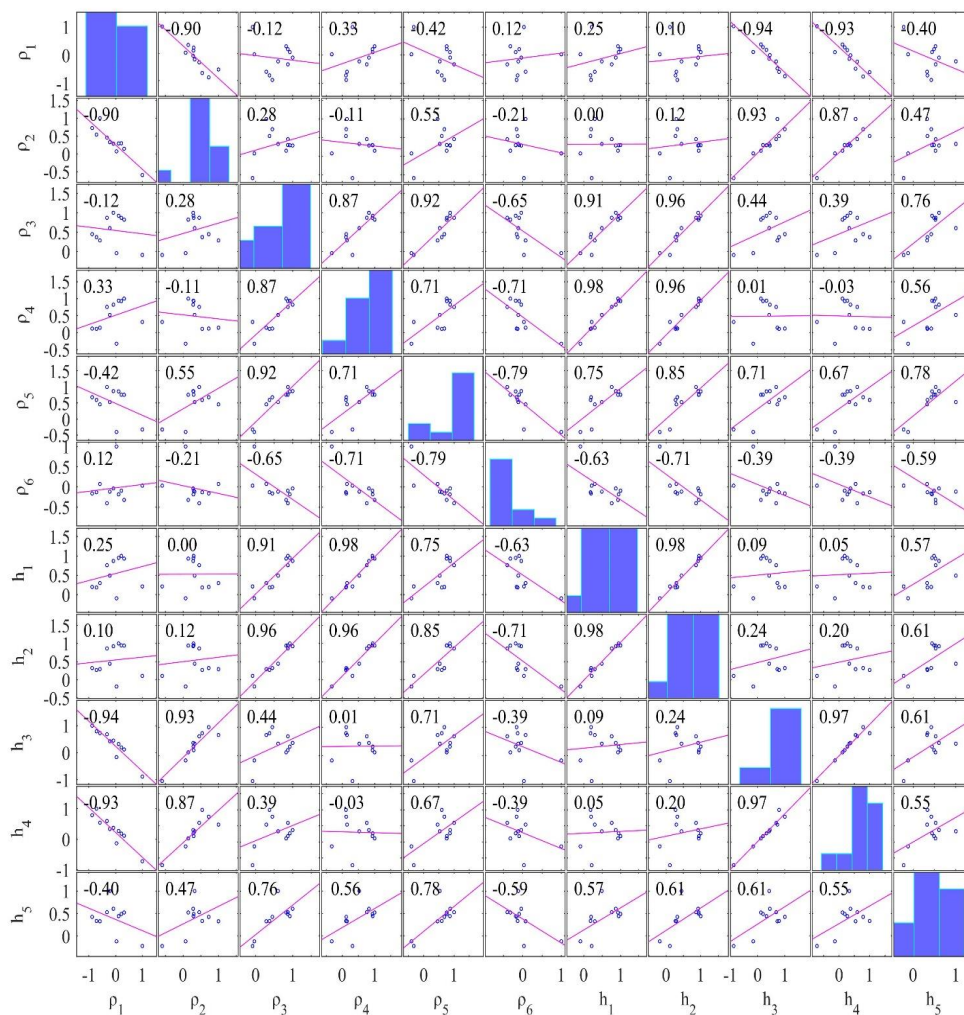

591 **Figure 15** Correlation matrix of field data taken from the geothermal rich area, Island of Milos,  
 592 Greece for PSO



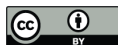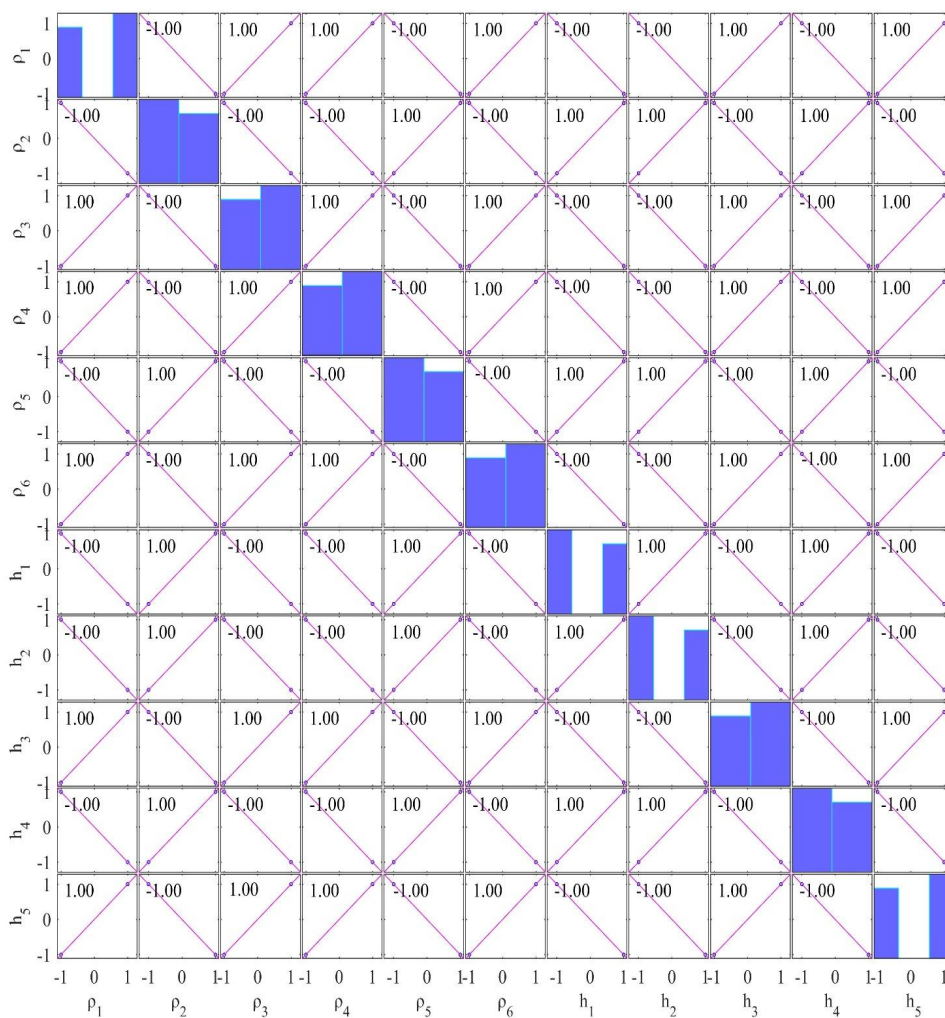

593 **Figure 16** Correlation matrix of field data taken from island geothermal rich area of Milos, Greece

594 for GSA

595

596

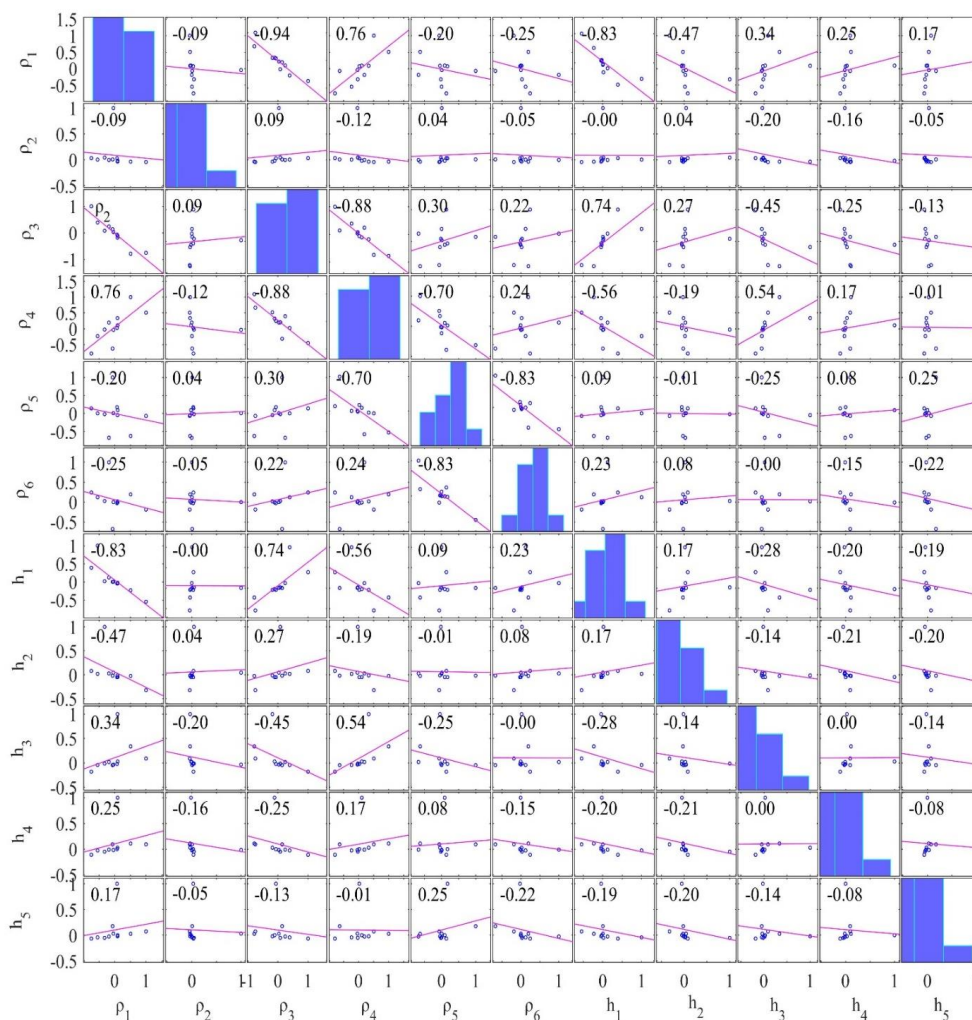

597 **Figure 17** Correlation matrix of field data taken from island geothermal rich area of Milos, Greece  
 598 for hybrid wPSOGSA

599

600 **4.4 Application to field MT data-Newcastleton, Southern upland, Scotland**

601 Another field example of MT data was picked to illustrate our technique from Newcastleton

602 (2.796° W, 55.196° N in Geographic coordinates), Southern Uplands of Scotland. By the Southern



603 Uplands fault, the Southern Uplands are isolated from the Midland Valley. The bulk of the  
604 Southern Uplands comprises Silurian/Lower Paleozoic sedimentary deposits such as greywackes  
605 and shales that originated in the Iapetus Ocean during the late Neoproterozoic and early Paleozoic  
606 geologic eras. These rocks emerged from the seafloor as an accretionary wedge during the  
607 Caledonian orogeny. The majority of the rocks are coarse greywacke, a kind of sandstone that has  
608 been poorly metamorphosed and contains angular quartz, feldspar, and small rock fragments. The  
609 Midland Valley and Northern England, on the other hand, are known for their thick Carboniferous  
610 layers, which are used to measure coal. The geomagnetic studies by Jones and Hutton (1979) have  
611 shown that the Southern Uplands are characteristic of a typical continent, with a zone of very high  
612 electrical conductivity. The location of the MT site and the geology of the study area are shown  
613 in Fig. 18.

614         During nine days in the frequency range of 0.1 Hz to 0.0001 Hz, the variations of the  
615 magnetic and telluric fields concerning the time at four sites along a line perpendicular to the  
616 anomaly's strike were recorded, keeping a high signal to noise ratio where the anisotropy ratios  
617 are so near to one and the skew factor is less than 0.1 for the majority of periods. Due to low  
618 anisotropy ratios and skew factor, the resistivity distribution under this location is one-dimensional  
619 (Jones and Hutton, 1979). Here one set of MT data is inverted using PSO, GSA, and wPSOGSA  
620 to obtain the best fitting apparent resistivity curve, apparent phase curve, and 1D depth model as  
621 shown in subfigures Fig. 19(a), Fig. 19(b), and Fig. 19(c), respectively. Figure 19 shows a realistic  
622 one-dimensional resistivity variation, with a phase response ranging from 60° at 100 seconds to  
623 35° at 1000 seconds, which can only be obtained by establishing a conducting zone at lower  
624 crustal/upper mantle levels (Jones and Hutton, 1979).

625         The execution time for wPSOGSA (33 seconds) is the least as compared to GSA (34  
626 seconds) and PSO (53 seconds). The convergence iterations are 79, 101, and 65, and associated  
627 misfit errors are 3.79, 4.72, and 3.70 for PSO, GSA, and wPSOGSA, respectively.

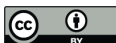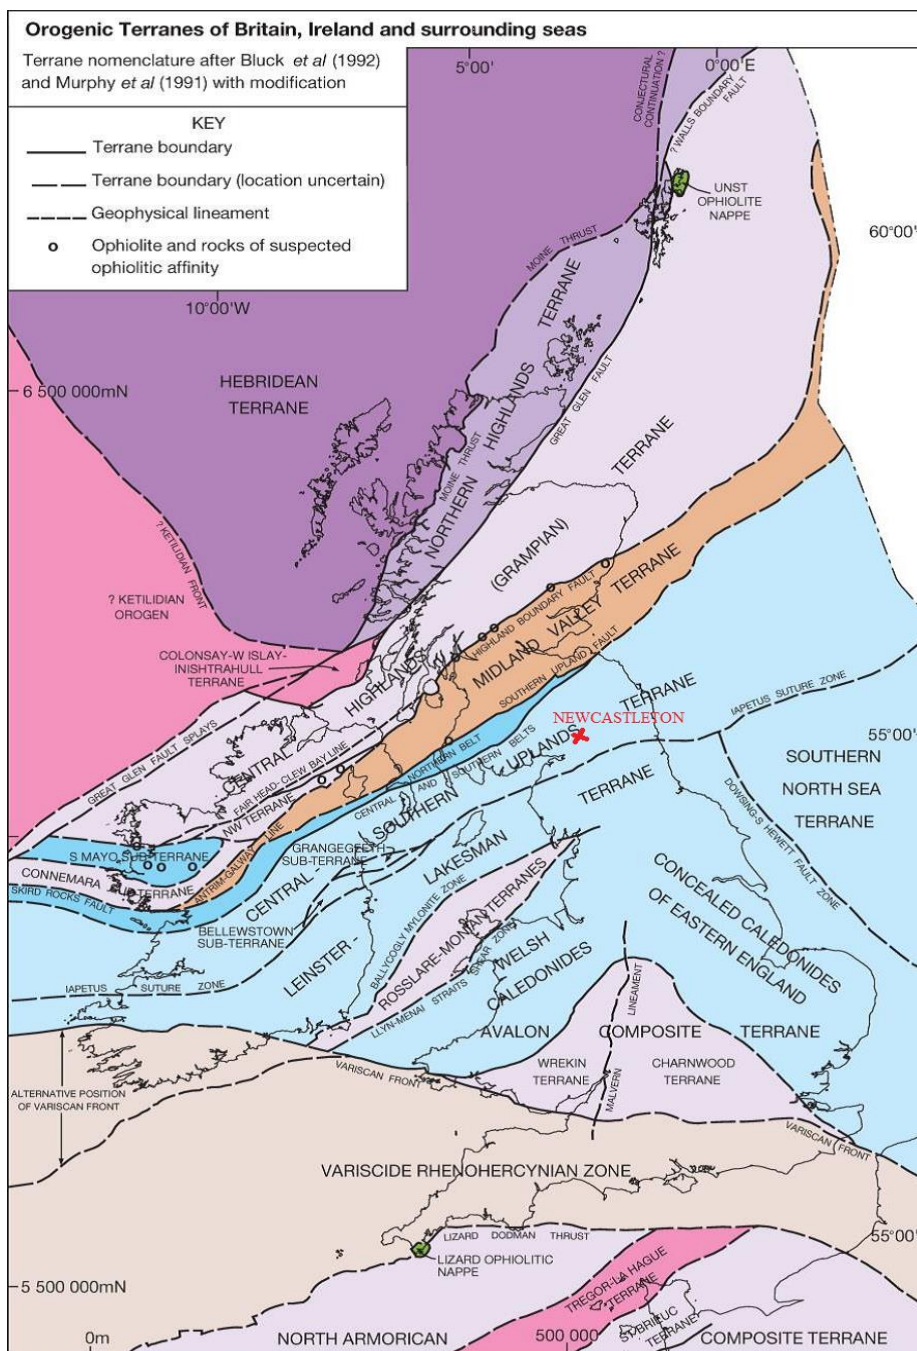

628

629 **Figure 18** The location of MT site and geology of the Southern upland, Scotland (after BGS,

630 2016)



631 The inverted MT model is illustrated in subfigure Fig. 19(c), which depicts two low  
632 conductive zones at a depth of 21 km and 400 km. The first conductive layer ( $70 \Omega\text{m}$ ) with a  
633 thickness of 28 km is underlain by a high resistive top layer of thickness of 21 km, and the second  
634 very high conductive layer (less than  $1.0 \Omega\text{m}$ ) at a depth of 400 km is underlain by high resistive  
635 layer ( $550 \Omega\text{m}$ ) of thickness 351 km. Thus the last layer of a very high conductive zone (i.e.,  
636 resistivity less than  $1.0 \Omega\text{m}$ ) as a lower crust/upper mantle conductor at a depth of 400 km is  
637 estimated. At 400 m depths, a conducting zone meets both the amplitude and phase long period  
638 responses. This explanation is directly equivalent to accepted models derived from Monte-Carlo  
639 models for the structure underlying the Southern Uplands.

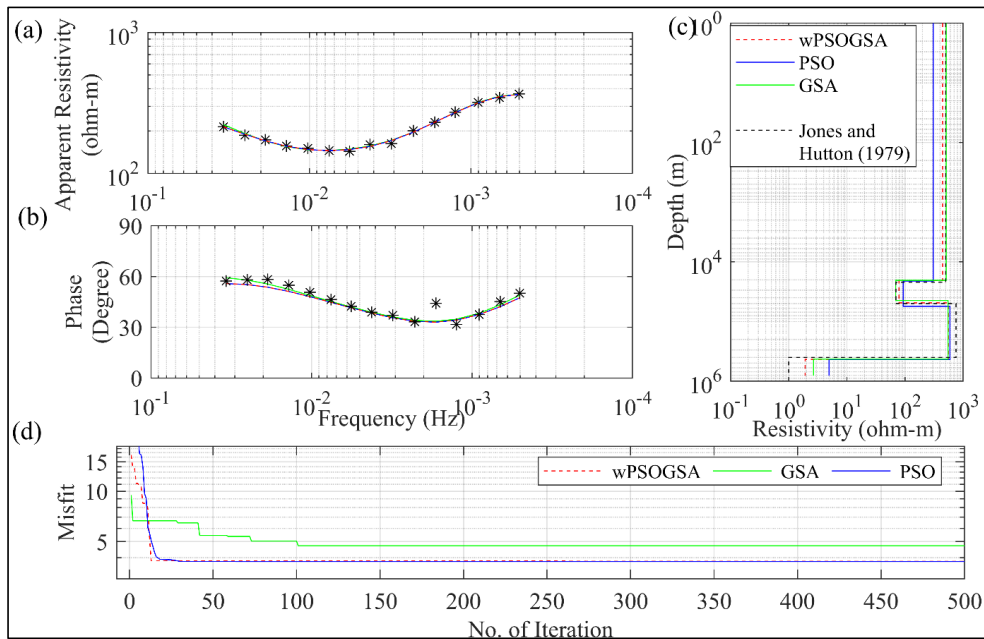

640  
641 **Figure 19** The inverted MT response by PSO (blue color), GSA (green color), and hybrid  
642 wPSOGSA (red color) with a true model (black color) over Newcastleton, Southern Scotland, as  
643 shown in (a) observed and calculated apparent resistivity curve, (b) observed and calculated  
644 apparent phase curve, (c) 1D depth inverted model and (d) convergence curve  
645





646 **Table 6** Search range, inverted results by posterior PDF (68.27 % CI) using PSO, GSA, and  
 647 wPSOGSA for field data.

| Layer parameters | $\rho_1$<br>( $\Omega\text{m}$ ) | $\rho_2$<br>( $\Omega\text{m}$ ) | $\rho_3$<br>( $\Omega\text{m}$ ) | $\rho_4$<br>( $\Omega\text{m}$ ) | $h_1$<br>(m) | $h_2$<br>(m) | $h_3$<br>(m)  |
|------------------|----------------------------------|----------------------------------|----------------------------------|----------------------------------|--------------|--------------|---------------|
| Search Range     | 300-1000                         | 10-150                           | 250-1500                         | 0.1-5                            | 10000-30000  | 15000-35000  | 100000-450000 |
| Mean             | 304.47                           | 92.66                            | 591.52                           | 4.93                             | 20894.01     | 34776.15     | 379563.48     |
| Posterior        | 507.65                           | 69.38                            | 548.46                           | 2.66                             | 20493.18     | 24182.99     | 382090.23     |
|                  | 444.27                           | 78.94                            | 554.53                           | 1.91                             | 20591.39     | 28177.40     | 382181.50     |

648

649 **5 Conclusions**

650 The study presented the wPSOGSA algorithm along with PSO and GSA to evaluate their efficacy  
 651 and applicability to the MT data, which narrates the appraisal of 1D resistivity models from  
 652 apparent resistivity, apparent phase, and the frequency data sets. So, synthetic and field MT data  
 653 from various geological terrains were used to demonstrate the relevance of these methods, which  
 654 are further carried out by applying multiple runs, generating a large number of models that fit the  
 655 apparent resistivity and apparent phase curves. Then these best-fitting models within a specified  
 656 range are then chosen for statistical analysis. The statistical analysis includes posterior PDF based  
 657 on the Bayesian approach with 68.27 % CI, correlation matrix, and stability analysis to enhance  
 658 the accuracy of the mean model with the least uncertainty. However, a solution from the posterior  
 659 PDF based on the Bayesian of wPSOGSA is better than GSA, and PSO yields the reliability of the  
 660 inversion algorithm. In general, conventional techniques can effectively resolve the model in  
 661 random noise, but they can miscarry in methodical error or inappropriate models. The performance  
 662 of the proposed algorithms has been analyzed based on the mean model, uncertainty, and stability  
 663 of layered earth models, and found that the results obtained from wPSOGSA are reliable, stable,  
 664 and more accurate than the available results, which are fitted well with borehole lithology.

665



666 **Acknowledgments**

667 The authors would like to express their gratitude to the IIT(ISM), Dhanbad, for providing a  
668 pleasant environment to pursue this study and support for the research. We also express our  
669 gratitude to the Editor-in-Chief, Associate Editor, and anonymous reviewers, whose suggestions  
670 and comments enabled us to better understanding of the issue and considerably improve our  
671 manuscript.

672

673 **Declarations**

674 **Competing interests**

675 The authors have no relevant financial or non-financial interests to disclose and no competing  
676 interests to declare that are relevant to the content of this article. All authors certify that they have  
677 no affiliations with or involvement in any organization or entity with any financial interest or non-  
678 financial interest in the subject matter or materials discussed in this manuscript.

679

680 **Data availability statement**

681 The datasets used for the present study and analysis have been taken from published paper, cited  
682 in the manuscript.

683

684 **Authors' contribution statement**

685 **Mukesh:** Conceptualization of the study, Methodology, Computer code, Analysis, Drafting of  
686 the manuscript.

687 **Kuldeep Sarkar:** Methodology, Computer code, Analysis, Drafting the manuscript

688 **Upendra K. Singh:** Supervision, Suggestions, and editing.

689

690

691



692 **References**

- 693 Cagniard, L.: Basic theory of the magneto-telluric method of geophysical prospecting, *Geophys*,  
694 18, 605–635, <https://doi.org/10.1190/1.1437915>, 1953.
- 695 Colorni, A., Dorigo, M., and Maniezzo, V.: Distributed Optimization by Ant Colonies,  
696 Proceedings of the First European Conference on Artificial Life, Paris, France, 134–142 pp.,  
697 1991.
- 698 Constable, S. C., Parker, R. L., and Constable, C. G.: Occam's inversion: A practical algorithm  
699 for generating smooth models from electromagnetic sounding data, *Geophys*, 52, 289–300,  
700 <https://doi.org/10.1190/1.1442303>, 1987.
- 701 "Dawes, G. J. K. ": Magnetotelluric feasibility study: Island of Milos, Greece, Luxembourg,  
702 1986.
- 703 Dosso, S. E. and Oldenburg, D. W.: Magnetotelluric appraisal using simulated annealing,  
704 *Geophys. J. Int.*, 106, 379–385, <https://doi.org/10.1111/j.1365-246X.1991.tb03899.x>, 1991.
- 705 Hutton, V. R. S., Galanopoulos, D., Dawes, G. J. K., and Pickup, G. E.: A high resolution  
706 magnetotelluric survey of the Milos geothermal prospect, *Geothermics*, 18, 521–532,  
707 [https://doi.org/10.1016/0375-6505\(89\)90054-0](https://doi.org/10.1016/0375-6505(89)90054-0), 1989.
- 708 Jones, A. G. and Hutton, R.: A multi-station magnetotelluric study in southern Scotland – I.  
709 Fieldwork, data analysis and results, *Geophys. J. Int.*, 56, 329–349,  
710 <https://doi.org/10.1111/j.1365-246X.1979.tb00168.x>, 1979.
- 711 Kennedy, J. and Eberhart, R.: Particle swarm optimization, in: Proceedings of ICNN'95 -  
712 International Conference on Neural Networks, 1942–1948 vol.4,  
713 <https://doi.org/10.1109/ICNN.1995.488968>, 1995.





- 714 Khishe, M. and Mosavi, M. R.: Chimp optimization algorithm, *Expert Syst. Appl.*, 149, 113338,  
715 <https://doi.org/10.1016/j.eswa.2020.113338>, 2020.
- 716 Kirkpatrick, S., Gelatt C., D., and Vecchi M., P.: Optimization by Simulated Annealing, *Science*,  
717 220, 671–680, <https://doi.org/10.1126/science.220.4598.671>, 1983.
- 718 Kunche, P., Sasi Bhushan Rao, G., Reddy, K. V. V. S., and Uma Maheswari, R.: A new  
719 approach to dual channel speech enhancement based on hybrid PSO-GSA, *Int. J. Speech*  
720 *Technol.*, 18, 45–56, <https://doi.org/10.1007/s10772-014-9245-5>, 2015.
- 721 Li, S.-Y., Wang, S.-M., Wang, P.-F., Su, X.-L., Zhang, X.-S., and Dong, Z.-H.: An improved  
722 grey wolf optimizer algorithm for the inversion of geoelectrical data, *Acta Geophys.*, 66, 607–  
723 621, <https://doi.org/10.1007/s11600-018-0148-8>, 2018.
- 724 Lynch, S. M.: Introduction to applied Bayesian statistics and estimation for social scientists,  
725 Springer, New York, 2007.
- 726 Miecznik, J., Wojdyła, M., and Danek, T.: Application of nonlinear methods to inversion of 1D  
727 magnetotelluric sounding data based on very fast simulated annealing, *Acta Geophys. Pol.*, Vol.  
728 51, nr 3, 307–322, 2003.
- 729 Mirjalili, S. and Hashim, S. Z. M.: A new hybrid PSO-GSA algorithm for function optimization,  
730 in: 2010 International Conference on Computer and Information Application, 374–377,  
731 <https://doi.org/10.1109/ICCIA.2010.6141614>, 2010.
- 732 Mirjalili, S., Mirjalili, S. M., and Lewis, A.: Grey Wolf Optimizer, *Adv. Eng. Softw.*, 69, 46–61,  
733 <https://doi.org/10.1016/j.advengsoft.2013.12.007>, 2014.

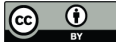

- 734 Nabighian, M. N. and Asten, M. W.: Metalliferous mining geophysics—State of the art in the  
735 last decade of the 20th century and the beginning of the new millennium, *Geophysics*, 67, 964–  
736 978, <https://doi.org/10.1190/1.1484538>, 2002.
- 737 Pérez-Flores, M. A. and Schultz, A.: Application of 2-D inversion with genetic algorithms to  
738 magnetotelluric data from geothermal areas, *Earth Planets Space*, 54, 607–616,  
739 <https://doi.org/10.1186/BF03353049>, 2002.
- 740 Rashedi, E., Nezamabadi-pour, H., and Saryazdi, S.: GSA: A Gravitational Search Algorithm,  
741 *Inf. Sci.*, 179, 2232–2248, <https://doi.org/10.1016/j.ins.2009.03.004>, 2009.
- 742 Rodi, W. and Mackie, R. L.: Nonlinear conjugate gradients algorithm for 2-D magnetotelluric  
743 inversion, *Geophysics*, 66, 174–187, <https://doi.org/10.1190/1.1444893>, 2001.
- 744 Ross, S.: *Probability and statistics for engineers and scientists*, Elsevier, New Delhi, 2009.
- 745 Roy, A. and Kumar, T. S.: Gravity inversion of 2D fault having variable density contrast using  
746 particle swarm optimization, *Geophys. Prospect.*, 69, 1358–1374, <https://doi.org/10.1111/1365-2478.13094>, 2021.
- 748 Sen, M. K. and Stoffa, P. L.: Bayesian inference, Gibbs’s sampler and uncertainty  
749 estimation in geophysical inversion1, *Geophys. Prospect.*, 44, 313–350,  
750 <https://doi.org/10.1111/j.1365-2478.1996.tb00152.x>, 1996.
- 751 Sen, M. K. and Stoffa, P. L.: *Global Optimization Methods in Geophysical Inversion*,  
752 Cambridge University Press, Cambridge, <https://doi.org/10.1017/CBO9780511997570>, 2013.
- 753 Şenel, F. A., Gökçe, F., Yüksel, A. S., and Yiğit, T.: A novel hybrid PSO–GWO algorithm for  
754 optimization problems, *Eng. Comput.*, 35, 1359–1373, <https://doi.org/10.1007/s00366-018-0668-5>, 2019.



- 756 Sharma, S. P.: VFSARES—a very fast simulated annealing FORTRAN program for  
757 interpretation of 1-D DC resistivity sounding data from various electrode arrays, *Comput.*  
758 *Geosci.*, 42, 177–188, <https://doi.org/10.1016/j.cageo.2011.08.029>, 2012.
- 759 Shaw, R. and Srivastava, S.: Particle Swarm Optimization: A new tool to invert geophysical  
760 data, *Geophysics*, 72, <https://doi.org/10.1190/1.2432481>, 2007.
- 761 Simon, D.: Biogeography-Based Optimization, *IEEE Trans. Evol. Comput.*, 12, 702–713,  
762 <https://doi.org/10.1109/TEVC.2008.919004>, 2008.
- 763 Simpson, F. and Bahr, K.: *Practical Magnetotellurics*, Cambridge University Press, 2005.
- 764 Stewart, A. L. and McPhie, J.: Facies architecture and Late Pliocene – Pleistocene evolution of a  
765 felsic volcanic island, Milos, Greece, *Bull. Volcanol.*, 68, 703–726,  
766 <https://doi.org/10.1007/s00445-005-0045-2>, 2006.
- 767 Storn, R. and Price, K.: Differential Evolution – A Simple and Efficient Heuristic for global  
768 Optimization over Continuous Spaces, *J. Glob. Optim.*, 11, 341–359,  
769 <https://doi.org/10.1023/A:1008202821328>, 1997.
- 770 Tarantola, A.: Inverse Problem Theory and Methods for Model Parameter Estimation,  
771 <https://doi.org/10.1137/1.9780898717921>, 2005.
- 772 Tarantola, A. and Valette, B.: Generalized nonlinear inverse problems solved using the least  
773 squares criterion, *Rev. Geophys.*, 20, 219–232, <https://doi.org/10.1029/RG020i002p00219>,  
774 1982.
- 775 Ward, S. H. and Hohmann, G. W.: 4. Electromagnetic Theory for Geophysical Applications, in:  
776 *Electromagnetic Methods in Applied Geophysics: Volume 1, Theory*, Society of Exploration  
777 Geophysicists, 130–311, <https://doi.org/10.1190/1.9781560802631.ch4>, 1988.



- 778 Wen, L., Cheng, J., Li, F., Zhao, J., Shi, Z., and Zhang, H.: Global optimization of controlled  
779 source audio-frequency magnetotelluric data with an improved artificial bee colony algorithm, *J.*  
780 *Appl. Geophys.*, 170, 103845, <https://doi.org/10.1016/j.jappgeo.2019.103845>, 2019.
- 781 Whitley, D.: A genetic algorithm tutorial, *Stat. Comput.*, 4, 65–85,  
782 <https://doi.org/10.1007/BF00175354>, 1994.
- 783 Xiong, J., Liu, C., Chen, Y., and Zhang, S.: A non-linear geophysical inversion algorithm for the  
784 mt data based on improved differential evolution, *Eng. Lett.*, 26, 161–170, 2018.
- 785 Yang, X.-S.: A New Metaheuristic Bat-Inspired Algorithm, in: *Nature Inspired Cooperative*  
786 *Strategies for Optimization (NICSO 2010)*, edited by: González, J. R., Pelta, D. A., Cruz, C.,  
787 Terrazas, G., and Krasnogor, N., Springer Berlin Heidelberg, Berlin, Heidelberg, 65–74,  
788 [https://doi.org/10.1007/978-3-642-12538-6\\_6](https://doi.org/10.1007/978-3-642-12538-6_6), 2010a.
- 789 Yang, X.-S.: Firefly algorithm, stochastic test functions and design optimisation, *Int J Bio*  
790 *Inspired Comput*, 2, 78–84, <https://doi.org/10.48550/arxiv.1003.1409>, 2010b.
- 791 Zhang, Z., Ding, S., and Jia, W.: A hybrid optimization algorithm based on cuckoo search and  
792 differential evolution for solving constrained engineering problems, *Eng. Appl. Artif. Intell.*, 85,  
793 254–268, <https://doi.org/10.1016/j.engappai.2019.06.017>, 2019.
- 794
